# Supplementary material for: Performance of Quantitative Measures of Multimorbidity: A Population-Based Retrospective Analysis
Source: Research Square preprint supplement (doi:10.21203/rs.3.rs-209438/v1), 2021-03-01
Supplement: Supplementary file 1 [file 8aff9f5e217454201ea68e37.pdf]

# Performance of five tools for measuring multimorbidity in explaining health outcomes in the general population; a cross-sectional, population-based analysis

Emili Vela,<sup>1,2</sup> Montse Clèries,<sup>1,2</sup> David Monterde,<sup>1,2,3</sup> Gerard Carot-Sans,<sup>1,2</sup> Marc Coca,<sup>1,2</sup> Damià Valero,<sup>1,2</sup> Jordi Piera-Jiménez,<sup>1,2,3</sup> Luís García Eroles,<sup>1,2</sup> and Pol Pérez Sust.<sup>1</sup>

1. Servei Català de la Salut, Barcelona, Spain.
2. Digitalization for the Sustainability of the Healthcare System (DS3), Sistema de Salut de Catalunya, Barcelona, Spain.
3. Sistemes d'Informació, Institut Català de la Salut, Barcelona, Catalonia, Spain
4. Open Evidence Research Group, Universitat Oberta de Catalunya, Barcelona, Spain

Supplementary file 1

# 1 SUPPLEMENTARY MATERIALS

## 1.1 ALGORITHM FOR HEALTH RISK STRATIFICATION ACCORDING TO THE ADJUSTED MORBIDITY GROUPS

Figure S1. Algorithm overview of the adjusted morbidity groups (GMA) tool

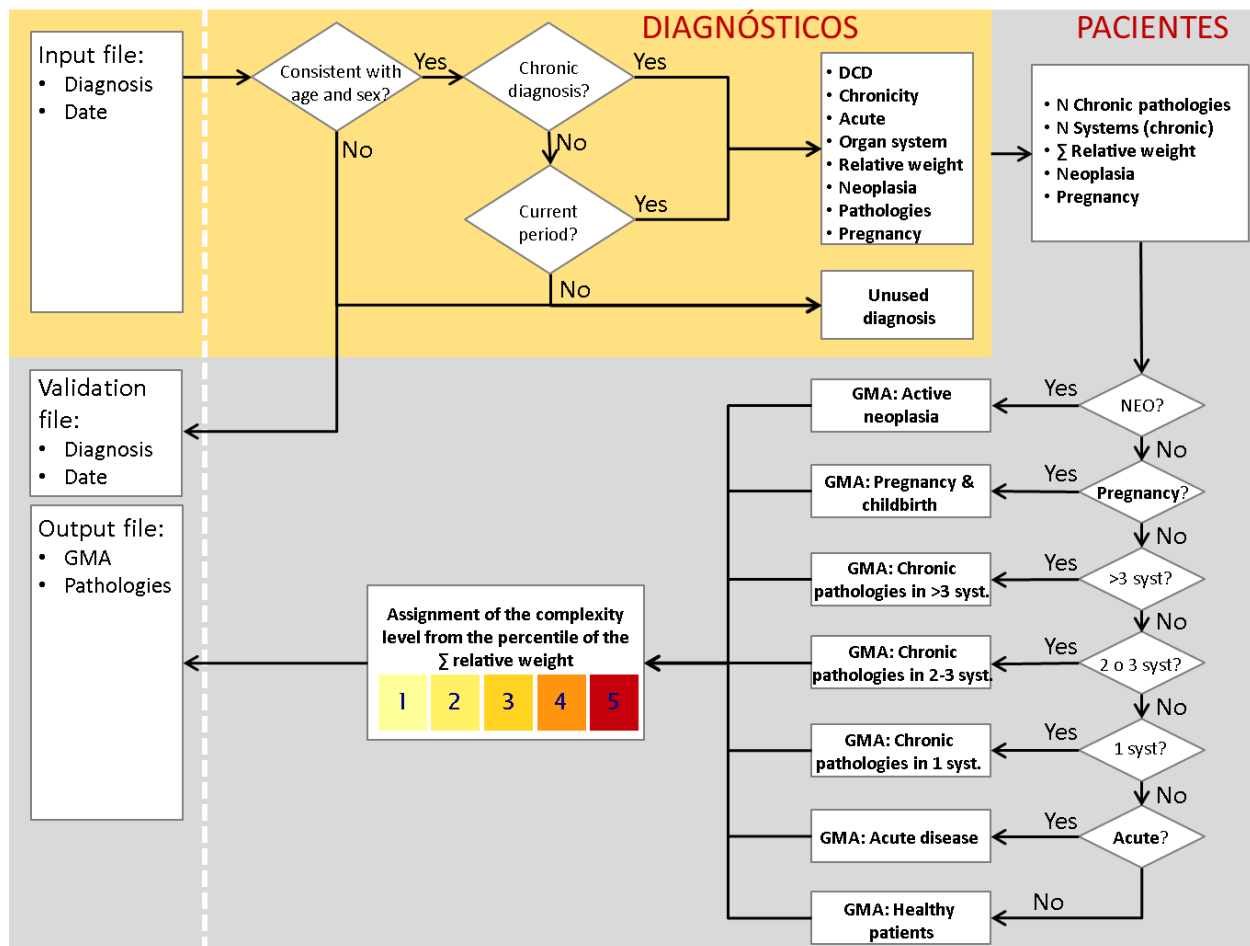

### ALGORITHM INPUT

The input file of the model contains essential personal information of the individual (i.e., identification number, birth date, and sex) and a list of his/her diagnoses (and/or relevant health conditions). Each record in the input file corresponds to a diagnostic/health condition and includes the following variables:

- **Type of diagnostic classification used.** The GMA tool has been designed to accept the following international codifications: ICD-9 CM, ICD-10, ICD-10-CM, CIAP-1, and CIAP-2. The system can handle different classifications simultaneously (e.g., for a given individual, illnesses diagnosed in the primary care and hospital settings may be recorded using different classification systems).
- **Code of the health condition.**
- **Date of diagnosis.**

## DATA PROCESSING

Before processing input records, the algorithm assesses the consistency of the diagnostic code with age and gender (inconsistencies are recorded in a validation file that can be reviewed later) and validates the diagnostic date (chronic conditions diagnosed after the end of the analyzed period and acute conditions diagnosed before the analyzed period are excluded). Then, the algorithm generates a table with the following information regarding the diagnostic or health condition:

- **Diagnostic code.**
- **Identification of diagnostic code group.** Instead of considering all possible diagnostic codes individually (diagnostic classification systems may exceed 90,000 codes depending on the exhaustivity level), the GMA tool uses the diagnostic code groups (DCG), which groups all codes associated with a given disease.
- **Identification of chronicity.** Diagnoses are identified as a chronic condition based on the criteria of the healthcare cost and utilization project (HCUP) of the US Agency for Healthcare Research and Quality,<sup>1</sup> which considers all diseases with the following characteristics: (a) the given disease place limitations on self-care, independent living, and social interactions, and (b) result in the need for ongoing intervention with medical products, services, and special equipment.<sup>2</sup>
- **Identification of acute pathology.** Individuals with any DCG associated with an acute disease with a diagnosis date within the analysis period.
- **Identification of neoplasia.** Individuals with any DCG associated with any neoplasia code and diagnosis date within the analysis period or a year before.
- **Identification of pregnancy and/or childbirth.** Individuals with any DCG associated with pregnancy and/or delivery within the analysis period.
- **Identification of the affected organ system.** The algorithm discriminates between chronic conditions that affect different systems and those that affect the same system. Each DCG is assigned to a system according to the criteria of the international classification of diseases: infections, neoplasms, digestive system, circulatory system, etc.
- **Weighted complexity of the DCG.** The complexity level of each DCG is determined based on three relevant information blocks corresponding to individuals with the given DCG: (1) mortality, (2) healthcare needs (i.e., number of scheduled and unscheduled hospital admissions and primary care visits), and (3) number of prescribed drugs. The weight values have been obtained by modeling DCG and outcome data from the catchment population of the Catalan Healthcare System (7.5 million people; data collected in 2011).
- **Relevant pathology label.** The algorithm identifies the presence of relevant diseases among a pre-defined list of 80 DCGs. Neoplasms are classified as active or previous.

Individuals are first assigned to a given morbidity group code by checking the presence of the presence of the following conditions sequentially:

- Active neoplasia (code 40).
- Pregnancy and/or childbirth-related pathology (code 20).
- 4  $\geq$  systems affected by a chronic condition (code 33).
- 2-to-3 systems affected by a chronic condition (code 32).
- 1 system affected by a chronic condition (code 31).
- Acute illness (code 10).
- Healthy (code 00).

The morbidity group code is complemented with a 4-point complexity score, assigned based on cutoff points corresponding to the 40th, 70th, 85th, and 95th percentiles of the complexity distribution in the entire population.

## OUTPUT

The algorithm releases the following summary information regarding the morbidity burden:

- **The morbidity group.** Combination of the morbidity group code and group complexity score.
- **Clinical label.** List of relevant diseases.
- **Morbidity index.** Weighted complexity of DCGs at the individual level. Since the morbidity index is a continuous variable, it can be used to allocate each individual into one of the four risk groups established according to the distribution of the general population: healthy (up to 50<sup>th</sup> percentile), low-risk group (50<sup>th</sup> to 85<sup>th</sup> percentile), moderate-risk group (85<sup>th</sup> to 95<sup>th</sup> percentile), and high-risk group (above 95<sup>th</sup> percentile).

## REFERENCES

1. Agency for Healthcare Research and Quality. Healthcare Cost and Utilization Project (HCUP). Available at: <https://www.ahrq.gov/data/hcup/index.html>. Accessed December 3, 2020.
2. Perrin EC, Newacheck P, Pless IB, *et al.* Issues involved in the definition and classification of chronic health conditions. *Pediatrics* 1993; **91**: 787–93.

## 2 SUPPLEMENTARY TABLES

**Table S1.** Characteristics of the study population and rate of occurrence of each of the investigated outcomes. Subgroup >65 years. Outcome results are presented as percentages.

|                                         | No.     | All-cause death | Hospitalization | Non-scheduled hospitalization | Primary care visits | ER utilization | Medication use | Admission to skilled nursing facility | Expenditure |
|-----------------------------------------|---------|-----------------|-----------------|-------------------------------|---------------------|----------------|----------------|---------------------------------------|-------------|
| <b>Gender</b>                           |         |                 |                 |                               |                     |                |                |                                       |             |
| Male                                    | 633,060 | 4.32            | 20.98           | 11.75                         | 14.62               | 7.16           | 15.29          | 3.25                                  | 16.20       |
| Female                                  | 839,563 | 3.62            | 17.69           | 9.25                          | 15.56               | 6.21           | 18.01          | 3.59                                  | 13.01       |
| <b>Age group</b>                        |         |                 |                 |                               |                     |                |                |                                       |             |
| 65-69                                   | 387,361 | 0.98            | 12.85           | 4.95                          | 6.75                | 4.12           | 9.32           | 0.80                                  | 9.22        |
| 70-74                                   | 342,204 | 1.43            | 16.61           | 6.77                          | 10.48               | 5.31           | 13.93          | 1.39                                  | 12.08       |
| 75-79                                   | 241,647 | 2.55            | 21.16           | 9.84                          | 16.16               | 7.03           | 19.38          | 2.71                                  | 15.90       |
| 80-84                                   | 234,775 | 4.77            | 23.87           | 13.99                         | 22.32               | 8.68           | 23.31          | 4.97                                  | 18.71       |
| 85-89                                   | 164,848 | 8.64            | 25.35           | 18.60                         | 26.19               | 9.93           | 24.68          | 8.06                                  | 20.21       |
| 90-94                                   | 77,991  | 15.25           | 25.81           | 22.09                         | 26.82               | 9.87           | 22.65          | 11.05                                 | 19.57       |
| >95                                     | 23,797  | 23.57           | 23.77           | 21.65                         | 23.94               | 7.91           | 18.12          | 11.79                                 | 15.88       |
| <b>Socioeconomic status<sup>1</sup></b> |         |                 |                 |                               |                     |                |                |                                       |             |
| High                                    | 11,987  | 2.09            | 6.74            | 3.53                          | 3.32                | 1.69           | 5.81           | 0.50                                  | 5.74        |
| Moderate                                | 437,653 | 2.49            | 14.77           | 7.07                          | 9.27                | 4.46           | 11.36          | 1.73                                  | 10.50       |
| Low                                     | 982,899 | 4.56            | 21.13           | 11.79                         | 17.81               | 7.52           | 19.19          | 4.19                                  | 16.10       |
| Very low                                | 40,084  | 4.39            | 20.60           | 12.03                         | 18.01               | 9.50           | 22.39          | 4.67                                  | 17.08       |

<sup>1</sup>Stratified into four categories of pharmaceutical copayment: Very low (unemployed or recipient of social rescue aids), low (annual income < 18,000 €), moderate (annual income 18,000 to 100,000 €), and high (annual income >100,000 €).

Categorical outcomes were transformed to binary variables using the 95th percentile of the given variable among the target population as cutoff: hospital admission (i.e., one or more admissions), non-scheduled hospitalization (i.e., one or more admissions), admission to a skilled nursing facility for intermediate care (i.e., one or more admissions), admission to emergency room (i.e., more than two admissions), visit to primary care services (i.e., more than 21 visits), medication use (i.e., dispensation of more than 13 drugs belonging to different 5-digit group of the anatomic-therapeutic classification), expenditure (i.e., healthcare cost above 4,315.1 €)

**Table S2.** Characteristics of the study population and rate of occurrence of each of the investigated outcomes. Subgroup ischemic heart disease. Outcome results are presented as percentages.

|                                         | No.     | All-cause death | Hospitalization | Non-scheduled hospitalization | Primary care visits | ER utilization | Medication use | Admission to skilled nursing facility | Expenditure |
|-----------------------------------------|---------|-----------------|-----------------|-------------------------------|---------------------|----------------|----------------|---------------------------------------|-------------|
| <b>Gender</b>                           |         |                 |                 |                               |                     |                |                |                                       |             |
| Male                                    | 157,469 | 5.87            | 30.42           | 20.53                         | 20.91               | 11.88          | 28.68          | 4.25                                  | 28.15       |
| Female                                  | 86,842  | 7.32            | 31.36           | 22.35                         | 29.37               | 14.20          | 40.28          | 7.08                                  | 28.44       |
| <b>Age group</b>                        |         |                 |                 |                               |                     |                |                |                                       |             |
| 0-14                                    | 654     | 0.31            | 11.77           | 4.74                          | 6.42                | 10.86          | 0.76           | 0.00                                  | 9.33        |
| 15-24                                   | 553     | 0.18            | 11.03           | 5.24                          | 4.16                | 11.75          | 1.45           | 0.00                                  | 7.41        |
| 25-34                                   | 916     | 0.22            | 19.98           | 15.39                         | 8.62                | 15.07          | 3.82           | 0.11                                  | 14.30       |
| 35-39                                   | 1,259   | 0.40            | 22.48           | 15.65                         | 6.99                | 13.50          | 6.35           | 0.24                                  | 19.62       |
| 40-44                                   | 2,859   | 0.94            | 22.07           | 16.19                         | 10.00               | 12.00          | 9.13           | 0.45                                  | 20.08       |
| 45-49                                   | 5,773   | 0.87            | 22.40           | 15.57                         | 9.44                | 10.25          | 11.43          | 0.47                                  | 21.95       |
| 50-54                                   | 10,662  | 1.15            | 22.77           | 15.48                         | 10.51               | 9.57           | 14.52          | 0.66                                  | 22.87       |
| 55-59                                   | 16,563  | 1.64            | 23.93           | 15.52                         | 11.29               | 8.71           | 17.41          | 0.89                                  | 22.95       |
| 60-64                                   | 22,393  | 1.96            | 24.05           | 14.31                         | 13.06               | 8.40           | 21.75          | 1.26                                  | 23.00       |
| 65-69                                   | 30,068  | 2.55            | 27.02           | 15.90                         | 16.02               | 10.13          | 28.18          | 1.87                                  | 25.54       |
| 70-74                                   | 35,578  | 3.39            | 29.73           | 17.72                         | 21.54               | 11.43          | 34.47          | 2.85                                  | 28.01       |
| 75-79                                   | 32,290  | 5.32            | 33.86           | 21.51                         | 28.06               | 13.83          | 40.83          | 4.74                                  | 31.29       |
| 80-84                                   | 37,679  | 8.36            | 36.62           | 26.19                         | 34.52               | 15.80          | 43.76          | 7.85                                  | 33.59       |
| 85-89                                   | 29,233  | 13.29           | 37.60           | 30.45                         | 36.71               | 16.96          | 43.51          | 11.84                                 | 33.20       |
| 90-94                                   | 13,929  | 20.39           | 36.38           | 32.50                         | 35.68               | 16.66          | 38.97          | 15.28                                 | 30.43       |
| >95                                     | 3,902   | 28.52           | 34.01           | 31.37                         | 30.60               | 12.97          | 31.83          | 16.48                                 | 24.81       |
| <b>Socioeconomic status<sup>1</sup></b> |         |                 |                 |                               |                     |                |                |                                       |             |
| High                                    | 1,940   | 2.94            | 14.07           | 9.12                          | 5.72                | 3.81           | 12.27          | 0.62                                  | 14.23       |
| Moderate                                | 68,197  | 4.24            | 25.48           | 16.31                         | 16.12               | 8.79           | 23.97          | 2.83                                  | 22.37       |
| Low                                     | 165,332 | 7.32            | 33.00           | 23.18                         | 27.23               | 14.13          | 36.27          | 6.30                                  | 30.52       |
| Very low                                | 8,842   | 6.15            | 33.00           | 24.01                         | 26.05               | 18.15          | 40.70          | 5.41                                  | 34.23       |

<sup>1</sup>Stratified into four categories of pharmaceutical copayment: Very low (unemployed or recipient of social rescue aids), low (annual income < 18,000 €), moderate (annual income 18,000 to 100,000 €), and high (annual income >100,000 €).

Categorical outcomes were transformed to binary variables using the 95th percentile of the given variable among the target population as cutoff: hospital admission (i.e., one or more admissions), non-scheduled hospitalization (i.e., one or more admissions), admission to a skilled nursing facility for intermediate care (i.e., one or more admissions), admission to emergency room (i.e., more than two admissions), visit to primary care services (i.e., more than 21 visits), medication use (i.e., dispensation of more than 13 drugs belonging to different 5-digit group of the anatomic-therapeutic classification), expenditure (i.e., healthcare cost above 4,315.1 €)

**Table S3.** Characteristics of the study population and rate of occurrence of each of the investigated outcomes. Subgroup cirrhosis. Outcome results are presented as percentages.

|                                         | No.    | All-cause death | Hospitalization | Non-scheduled hospitalization | Primary care visits | ER utilization | Medication use | Admission to skilled nursing facility | Expenditure |
|-----------------------------------------|--------|-----------------|-----------------|-------------------------------|---------------------|----------------|----------------|---------------------------------------|-------------|
| <b>Gender</b>                           |        |                 |                 |                               |                     |                |                |                                       |             |
| Male                                    | 26,798 | 7.01            | 29.91           | 20.08                         | 13.58               | 12.71          | 16.66          | 4.55                                  | 29.19       |
| Female                                  | 18,328 | 4.87            | 25.03           | 15.38                         | 16.31               | 11.62          | 22.77          | 4.54                                  | 23.75       |
| <b>Age group</b>                        |        |                 |                 |                               |                     |                |                |                                       |             |
| 0-14                                    | 372    | 0.00            | 11.02           | 6.18                          | 4.30                | 8.60           | 0.81           | 0.00                                  | 8.60        |
| 15-24                                   | 329    | 0.00            | 7.60            | 4.26                          | 3.34                | 7.90           | 2.43           | 0.00                                  | 6.99        |
| 25-34                                   | 890    | 0.45            | 12.92           | 6.74                          | 2.81                | 9.21           | 2.02           | 0.34                                  | 7.64        |
| 35-39                                   | 1,074  | 0.74            | 12.57           | 8.57                          | 4.56                | 8.29           | 2.98           | 0.47                                  | 9.50        |
| 40-44                                   | 1,939  | 1.29            | 12.48           | 8.41                          | 5.36                | 8.66           | 4.90           | 0.83                                  | 13.51       |
| 45-49                                   | 3,056  | 2.68            | 18.49           | 12.53                         | 7.40                | 10.31          | 7.79           | 1.41                                  | 19.67       |
| 50-54                                   | 4,764  | 3.27            | 22.08           | 14.34                         | 8.35                | 10.52          | 10.79          | 1.66                                  | 23.95       |
| 55-59                                   | 5,815  | 3.77            | 24.90           | 15.72                         | 9.41                | 9.94           | 13.07          | 2.27                                  | 26.07       |
| 60-64                                   | 5,774  | 4.99            | 27.88           | 17.16                         | 11.57               | 10.81          | 16.68          | 3.50                                  | 27.21       |
| 65-69                                   | 5,875  | 5.48            | 29.72           | 17.57                         | 14.50               | 11.49          | 20.97          | 4.22                                  | 28.31       |
| 70-74                                   | 5,601  | 6.70            | 32.05           | 19.07                         | 17.80               | 13.27          | 26.01          | 4.73                                  | 29.99       |
| 75-79                                   | 3,909  | 9.54            | 38.09           | 25.04                         | 23.94               | 16.83          | 33.33          | 7.52                                  | 36.15       |
| 80-84                                   | 3,270  | 12.81           | 40.61           | 29.05                         | 30.83               | 17.83          | 36.39          | 11.44                                 | 37.98       |
| 85-89                                   | 1,782  | 19.25           | 42.26           | 34.23                         | 32.55               | 20.09          | 34.62          | 15.32                                 | 36.20       |
| 90-94                                   | 574    | 22.47           | 38.85           | 35.37                         | 31.88               | 15.33          | 31.53          | 17.07                                 | 33.10       |
| >95                                     | 102    | 27.45           | 34.31           | 33.33                         | 27.45               | 13.73          | 25.49          | 18.63                                 | 23.53       |
| <b>Socioeconomic status<sup>1</sup></b> |        |                 |                 |                               |                     |                |                |                                       |             |
| High                                    | 402    | 3.48            | 12.44           | 6.97                          | 3.48                | 4.23           | 7.96           | 0.75                                  | 14.68       |
| Moderate                                | 11,661 | 4.26            | 21.46           | 12.07                         | 9.28                | 7.53           | 13.08          | 2.36                                  | 19.10       |
| Low                                     | 29,758 | 6.86            | 30.12           | 20.12                         | 16.80               | 13.46          | 21.33          | 5.32                                  | 29.07       |
| Very low                                | 3,305  | 6.66            | 32.86           | 23.48                         | 16.13               | 19.18          | 22.21          | 5.75                                  | 37.40       |

<sup>1</sup>Stratified into four categories of pharmaceutical copayment: Very low (unemployed or recipient of social rescue aids), low (annual income < 18,000 €), moderate (annual income 18,000 to 100,000 €), and high (annual income >100,000 €).

Categorical outcomes were transformed to binary variables using the 95th percentile of the given variable among the target population as cutoff: hospital admission (i.e., one or more admissions), non-scheduled hospitalization (i.e., one or more admissions), admission to a skilled nursing facility for intermediate care (i.e., one or more admissions), admission to emergency room (i.e., more than two admissions), visit to primary care services (i.e., more than 21 visits), medication use (i.e., dispensation of more than 13 drugs belonging to different 5-digit group of the anatomic-therapeutic classification), expenditure (i.e., healthcare cost above 4,315.1 €)

**Table S4.** Characteristics of the study population and rate of occurrence of each of the investigated outcomes. Subgroup dementia. Outcome results are presented as percentages.

|                                         | No.    | All-cause death | Hospitalization | Non-scheduled hospitalization | Primary care visits | ER utilization | Medication use | Admission to skilled nursing facility | Expenditure |
|-----------------------------------------|--------|-----------------|-----------------|-------------------------------|---------------------|----------------|----------------|---------------------------------------|-------------|
| <b>Gender</b>                           |        |                 |                 |                               |                     |                |                |                                       |             |
| Male                                    | 33,278 | 19.40           | 36.16           | 30.22                         | 28.85               | 17.06          | 29.97          | 17.85                                 | 35.05       |
| Female                                  | 67,508 | 16.22           | 27.34           | 23.19                         | 24.52               | 11.83          | 27.62          | 14.43                                 | 24.97       |
| <b>Age group</b>                        |        |                 |                 |                               |                     |                |                |                                       |             |
| 0-14                                    | 123    | 0.00            | 11.38           | 8.13                          | 6.50                | 11.38          | 1.63           | 0.00                                  | 7.32        |
| 15-24                                   | 155    | 1.29            | 9.68            | 5.16                          | 2.58                | 13.55          | 1.94           | 0.00                                  | 14.19       |
| 25-34                                   | 261    | 0.38            | 10.34           | 6.51                          | 6.90                | 13.79          | 3.83           | 0.38                                  | 16.86       |
| 35-39                                   | 238    | 2.10            | 12.18           | 7.56                          | 13.45               | 15.97          | 7.98           | 1.68                                  | 22.69       |
| 40-44                                   | 376    | 0.80            | 15.16           | 6.91                          | 12.77               | 9.57           | 8.24           | 2.66                                  | 22.87       |
| 45-49                                   | 519    | 2.89            | 18.69           | 12.14                         | 13.29               | 14.64          | 9.44           | 5.01                                  | 26.97       |
| 50-54                                   | 665    | 2.71            | 19.40           | 12.18                         | 16.99               | 15.34          | 14.44          | 6.62                                  | 28.27       |
| 55-59                                   | 1,018  | 4.03            | 21.51           | 15.42                         | 16.11               | 12.08          | 15.91          | 10.22                                 | 28.49       |
| 60-64                                   | 1,738  | 6.33            | 21.29           | 15.02                         | 15.48               | 10.82          | 17.95          | 8.57                                  | 26.99       |
| 65-69                                   | 3,379  | 6.78            | 26.96           | 19.09                         | 19.24               | 13.82          | 24.39          | 11.19                                 | 29.48       |
| 70-74                                   | 6,964  | 7.73            | 27.61           | 19.60                         | 23.48               | 13.48          | 28.33          | 10.74                                 | 29.54       |
| 75-79                                   | 11,795 | 10.76           | 30.74           | 22.90                         | 26.46               | 14.72          | 31.25          | 13.29                                 | 30.65       |
| 80-84                                   | 23,749 | 14.11           | 30.92           | 25.34                         | 28.60               | 14.19          | 31.75          | 15.23                                 | 30.10       |
| 85-89                                   | 27,575 | 19.25           | 32.03           | 28.49                         | 28.01               | 13.77          | 30.39          | 17.14                                 | 28.67       |
| 90-94                                   | 16,809 | 27.24           | 31.89           | 29.88                         | 26.09               | 12.95          | 26.37          | 19.63                                 | 26.19       |
| >95                                     | 5,422  | 35.76           | 28.37           | 26.93                         | 20.73               | 9.98           | 20.23          | 18.57                                 | 20.20       |
| <b>Socioeconomic status<sup>1</sup></b> |        |                 |                 |                               |                     |                |                |                                       |             |
| High                                    | 313    | 10.86           | 16.61           | 14.06                         | 14.06               | 6.71           | 14.70          | 5.43                                  | 14.70       |
| Moderate                                | 17,054 | 15.19           | 27.72           | 22.84                         | 23.43               | 11.63          | 24.96          | 12.27                                 | 25.84       |
| Low                                     | 79,902 | 17.82           | 30.81           | 26.08                         | 26.59               | 13.82          | 29.13          | 16.24                                 | 28.70       |
| Very low                                | 3,517  | 15.58           | 31.02           | 26.39                         | 24.71               | 17.40          | 29.54          | 16.83                                 | 32.27       |

<sup>1</sup>Stratified into four categories of pharmaceutical copayment: Very low (unemployed or recipient of social rescue aids), low (annual income < 18,000 €), moderate (annual income 18,000 to 100,000 €), and high (annual income >100,000 €).

Categorical outcomes were transformed to binary variables using the 95th percentile of the given variable among the target population as cutoff: hospital admission (i.e., one or more admissions), non-scheduled hospitalization (i.e., one or more admissions), admission to a skilled nursing facility for intermediate care (i.e., one or more admissions), admission to emergency room (i.e., more than two admissions), visit to primary care services (i.e., more than 21 visits), medication use (i.e., dispensation of more than 13 drugs belonging to different 5-digit group of the anatomic-therapeutic classification), expenditure (i.e., healthcare cost above 4,315.1 €)



**Table S5.** Characteristics of the study population and rate of occurrence of each of the investigated outcomes. Subgroup diabetes. Outcome results are presented as percentages.

|                                         | No.     | All-<br>cause<br>death | Hospitalization | Non-<br>scheduled<br>hospitalization | Primary<br>care visits | ER<br>utilization | Medication<br>use | Admission to<br>skilled nursing<br>facility | Expenditure |
|-----------------------------------------|---------|------------------------|-----------------|--------------------------------------|------------------------|-------------------|-------------------|---------------------------------------------|-------------|
| <b>Gender</b>                           |         |                        |                 |                                      |                        |                   |                   |                                             |             |
| Male                                    | 318,799 | 3.85                   | 21.60           | 12.75                                | 17.36                  | 8.03              | 19.95             | 3.12                                        | 19.28       |
| Female                                  | 269,722 | 4.09                   | 21.44           | 12.26                                | 22.56                  | 8.75              | 28.61             | 4.28                                        | 18.81       |
| <b>Age group</b>                        |         |                        |                 |                                      |                        |                   |                   |                                             |             |
| 0-14                                    | 2,518   | 0.08                   | 16.28           | 13.22                                | 16.00                  | 11.60             | 0.52              | 0.00                                        | 10.64       |
| 15-24                                   | 3,455   | 0.17                   | 9.99            | 7.50                                 | 6.60                   | 9.18              | 1.68              | 0.03                                        | 9.00        |
| 25-34                                   | 6,447   | 0.08                   | 12.95           | 8.22                                 | 7.71                   | 10.24             | 3.52              | 0.05                                        | 9.97        |
| 35-39                                   | 8,065   | 0.17                   | 11.52           | 6.72                                 | 7.74                   | 7.85              | 5.34              | 0.17                                        | 9.99        |
| 40-44                                   | 14,401  | 0.33                   | 9.96            | 5.29                                 | 8.83                   | 6.73              | 7.27              | 0.22                                        | 9.82        |
| 45-49                                   | 21,523  | 0.49                   | 10.63           | 5.23                                 | 9.66                   | 5.97              | 8.96              | 0.35                                        | 10.65       |
| 50-54                                   | 34,583  | 0.74                   | 12.21           | 6.05                                 | 10.70                  | 6.06              | 11.45             | 0.61                                        | 12.91       |
| 55-59                                   | 49,858  | 0.96                   | 14.60           | 7.02                                 | 11.60                  | 5.76              | 13.72             | 0.83                                        | 13.94       |
| 60-64                                   | 64,213  | 1.31                   | 16.42           | 7.58                                 | 12.70                  | 5.75              | 16.89             | 1.14                                        | 15.15       |
| 65-69                                   | 78,720  | 1.79                   | 19.11           | 9.01                                 | 14.50                  | 6.58              | 21.49             | 1.54                                        | 17.08       |
| 70-74                                   | 86,300  | 2.34                   | 22.49           | 10.92                                | 18.90                  | 7.67              | 26.87             | 2.39                                        | 19.76       |
| 75-79                                   | 71,275  | 3.87                   | 27.06           | 14.61                                | 25.22                  | 9.63              | 32.44             | 4.21                                        | 23.30       |
| 80-84                                   | 72,023  | 6.64                   | 29.57           | 19.21                                | 31.10                  | 11.42             | 35.94             | 7.00                                        | 25.76       |
| 85-89                                   | 49,702  | 11.02                  | 31.23           | 24.20                                | 34.29                  | 12.99             | 36.71             | 10.43                                       | 26.93       |
| 90-94                                   | 20,559  | 18.24                  | 31.12           | 27.18                                | 33.20                  | 12.67             | 32.68             | 13.55                                       | 25.34       |
| >95                                     | 4,879   | 27.26                  | 29.74           | 26.97                                | 30.31                  | 9.59              | 27.73             | 15.23                                       | 21.93       |
| <b>Socioeconomic status<sup>1</sup></b> |         |                        |                 |                                      |                        |                   |                   |                                             |             |
| High                                    | 3,188   | 2.57                   | 9.57            | 5.74                                 | 5.14                   | 2.54              | 11.14             | 0.69                                        | 9.41        |
| Moderate                                | 152,299 | 2.64                   | 17.73           | 9.22                                 | 13.55                  | 5.75              | 17.62             | 2.00                                        | 14.83       |
| Low                                     | 404,692 | 4.51                   | 23.08           | 13.79                                | 22.02                  | 9.12              | 25.99             | 4.32                                        | 20.51       |
| Very low                                | 28,342  | 3.21                   | 21.13           | 12.93                                | 22.16                  | 12.22             | 29.71             | 3.39                                        | 22.21       |

<sup>1</sup>Stratified into four categories of pharmaceutical copayment: Very low (unemployed or recipient of social rescue aids), low (annual income < 18,000 €), moderate (annual income 18,000 to 100,000 €), and high (annual income >100,000 €).

Categorical outcomes were transformed to binary variables using the 95th percentile of the given variable among the target population as cutoff: hospital admission (i.e., one or more admissions), non-scheduled hospitalization (i.e., one or more admissions), admission to a skilled nursing facility for intermediate care (i.e., one or more admissions), admission to emergency room (i.e., more than two admissions), visit to primary care services (i.e., more than 21 visits), medication use (i.e., dispensation of more than 13 drugs belonging to different 5-digit group of the anatomic-therapeutic classification), expenditure (i.e., healthcare cost above 4,315.1 €)

**Table S6.** Characteristics of the study population and rate of occurrence of each of the investigated outcomes. Subgroup heart failure. Outcome results are presented as percentages.

|                                         | No.     | All-cause death | Hospitalization | Non-scheduled hospitalization | Primary care visits | ER utilization | Medication use | Admission to skilled nursing facility | Expenditure |
|-----------------------------------------|---------|-----------------|-----------------|-------------------------------|---------------------|----------------|----------------|---------------------------------------|-------------|
| <b>Gender</b>                           |         |                 |                 |                               |                     |                |                |                                       |             |
| Male                                    | 89,974  | 12.96           | 44.36           | 35.05                         | 37.13               | 19.96          | 41.22          | 10.01                                 | 42.81       |
| Female                                  | 120,723 | 11.34           | 35.88           | 28.57                         | 36.05               | 16.50          | 39.88          | 10.92                                 | 32.31       |
| <b>Age group</b>                        |         |                 |                 |                               |                     |                |                |                                       |             |
| 0-14                                    | 1,564   | 1.02            | 21.74           | 12.53                         | 10.49               | 16.05          | 1.34           | 0.00                                  | 18.54       |
| 15-24                                   | 1,336   | 0.75            | 10.78           | 6.81                          | 2.92                | 11.00          | 3.22           | 0.07                                  | 8.23        |
| 25-34                                   | 4,308   | 0.21            | 11.84           | 8.43                          | 4.27                | 9.33           | 2.21           | 0.14                                  | 5.92        |
| 35-39                                   | 2,645   | 0.60            | 16.14           | 10.36                         | 7.18                | 10.40          | 5.37           | 0.34                                  | 12.36       |
| 40-44                                   | 3,290   | 0.88            | 15.93           | 9.33                          | 8.24                | 9.09           | 8.72           | 0.58                                  | 14.22       |
| 45-49                                   | 3,941   | 1.37            | 20.76           | 14.49                         | 12.21               | 11.27          | 13.25          | 0.91                                  | 21.14       |
| 50-54                                   | 5,476   | 2.79            | 25.35           | 17.62                         | 15.74               | 12.91          | 19.43          | 1.64                                  | 26.44       |
| 55-59                                   | 7,584   | 3.48            | 30.67           | 21.65                         | 19.87               | 13.05          | 25.99          | 2.51                                  | 32.27       |
| 60-64                                   | 10,236  | 4.77            | 34.43           | 23.62                         | 24.36               | 14.69          | 32.53          | 3.58                                  | 35.32       |
| 65-69                                   | 15,131  | 5.88            | 37.49           | 26.23                         | 29.20               | 16.71          | 39.30          | 4.75                                  | 38.21       |
| 70-74                                   | 21,355  | 6.49            | 40.41           | 28.61                         | 35.63               | 17.68          | 46.23          | 6.03                                  | 40.86       |
| 75-79                                   | 24,718  | 9.03            | 44.32           | 32.72                         | 42.35               | 20.43          | 50.96          | 9.09                                  | 43.30       |
| 80-84                                   | 38,854  | 12.21           | 44.84           | 35.65                         | 46.01               | 20.91          | 50.17          | 12.39                                 | 42.29       |
| 85-89                                   | 39,105  | 17.38           | 44.68           | 38.70                         | 45.99               | 20.59          | 46.87          | 16.41                                 | 40.23       |
| 90-94                                   | 23,404  | 24.65           | 43.02           | 39.41                         | 41.47               | 18.14          | 39.01          | 19.17                                 | 35.11       |
| >95                                     | 7,750   | 32.23           | 38.84           | 36.45                         | 34.45               | 14.04          | 30.71          | 19.28                                 | 27.72       |
| <b>Socioeconomic status<sup>1</sup></b> |         |                 |                 |                               |                     |                |                |                                       |             |
| High                                    | 682     | 10.12           | 26.10           | 19.50                         | 18.77               | 9.53           | 27.42          | 3.08                                  | 26.10       |
| Moderate                                | 40,646  | 9.66            | 35.58           | 26.77                         | 29.60               | 14.54          | 33.99          | 7.07                                  | 32.56       |
| Low                                     | 160,801 | 12.75           | 40.53           | 32.51                         | 38.45               | 18.63          | 41.92          | 11.49                                 | 37.70       |
| Very low                                | 8,568   | 9.92            | 39.93           | 31.97                         | 34.31               | 22.76          | 44.54          | 9.52                                  | 40.77       |

<sup>1</sup>Stratified into four categories of pharmaceutical copayment: Very low (unemployed or recipient of social rescue aids), low (annual income < 18,000 €), moderate (annual income 18,000 to 100,000 €), and high (annual income >100,000 €).

Categorical outcomes were transformed to binary variables using the 95th percentile of the given variable among the target population as cutoff: hospital admission (i.e., one or more admissions), non-scheduled hospitalization (i.e., one or more admissions), admission to a skilled nursing facility for intermediate care (i.e., one or more admissions), admission to emergency room (i.e., more than two admissions), visit to primary care services (i.e., more than 21 visits), medication use (i.e., dispensation of more than 13 drugs belonging to different 5-digit group of the anatomic-therapeutic classification), expenditure (i.e., healthcare cost above 4,315.1 €)

**Table S7.** Characteristics of the study population and rate of occurrence of each of the investigated outcomes. Subgroup chronic kidney disease. Outcome results are presented as percentages.

|                                         | No.     | All-cause death | Hospitalization | Non-scheduled hospitalization | Primary care visits | ER utilization | Medication use | Admission to skilled nursing facility | Expenditure |
|-----------------------------------------|---------|-----------------|-----------------|-------------------------------|---------------------|----------------|----------------|---------------------------------------|-------------|
| <b>Gender</b>                           |         |                 |                 |                               |                     |                |                |                                       |             |
| Male                                    | 132,274 | 8.62            | 33.59           | 23.25                         | 24.86               | 13.58          | 29.39          | 6.68                                  | 31.77       |
| Female                                  | 152,599 | 8.07            | 28.61           | 20.08                         | 28.14               | 11.93          | 32.20          | 8.04                                  | 25.39       |
| <b>Age group</b>                        |         |                 |                 |                               |                     |                |                |                                       |             |
| 0-14                                    | 659     | 0.61            | 28.68           | 20.03                         | 11.53               | 20.49          | 6.68           | 0.00                                  | 28.38       |
| 15-24                                   | 739     | 0.68            | 26.52           | 17.59                         | 3.92                | 15.83          | 6.36           | 0.14                                  | 25.17       |
| 25-34                                   | 1,622   | 0.68            | 21.95           | 13.13                         | 5.98                | 13.75          | 8.38           | 0.18                                  | 26.57       |
| 35-39                                   | 1,818   | 0.39            | 22.17           | 13.53                         | 6.82                | 11.99          | 11.11          | 0.66                                  | 30.36       |
| 40-44                                   | 2,870   | 1.08            | 21.39           | 12.65                         | 7.94                | 11.08          | 13.34          | 0.59                                  | 29.76       |
| 45-49                                   | 3,960   | 1.54            | 22.88           | 13.06                         | 10.30               | 10.66          | 15.71          | 1.09                                  | 30.20       |
| 50-54                                   | 6,035   | 2.17            | 24.52           | 14.32                         | 11.07               | 10.65          | 18.87          | 1.44                                  | 32.43       |
| 55-59                                   | 8,803   | 2.64            | 25.72           | 15.39                         | 13.17               | 11.68          | 22.13          | 2.00                                  | 31.10       |
| 60-64                                   | 13,491  | 3.11            | 25.85           | 14.62                         | 14.62               | 10.36          | 24.78          | 2.25                                  | 28.46       |
| 65-69                                   | 22,042  | 3.48            | 27.86           | 16.10                         | 17.00               | 11.16          | 27.98          | 2.87                                  | 27.71       |
| 70-74                                   | 33,782  | 3.77            | 28.99           | 16.70                         | 21.04               | 11.12          | 30.92          | 3.60                                  | 27.32       |
| 75-79                                   | 39,223  | 5.33            | 31.97           | 19.64                         | 26.71               | 12.81          | 34.52          | 5.53                                  | 29.22       |
| 80-84                                   | 57,212  | 7.74            | 32.98           | 22.76                         | 31.82               | 13.70          | 35.63          | 8.09                                  | 29.12       |
| 85-89                                   | 54,356  | 11.74           | 33.46           | 26.46                         | 34.54               | 14.04          | 34.31          | 11.18                                 | 28.61       |
| 90-94                                   | 29,255  | 18.65           | 33.58           | 29.62                         | 34.05               | 13.48          | 29.92          | 14.77                                 | 26.74       |
| >95                                     | 9,006   | 26.89           | 31.50           | 29.35                         | 30.93               | 11.35          | 24.53          | 15.87                                 | 22.15       |
| <b>Socioeconomic status<sup>1</sup></b> |         |                 |                 |                               |                     |                |                |                                       |             |
| High                                    | 1,042   | 4.61            | 18.81           | 12.28                         | 8.73                | 5.66           | 16.60          | 1.73                                  | 21.31       |
| Moderate                                | 61,758  | 6.05            | 26.92           | 17.16                         | 19.41               | 9.77           | 24.56          | 4.54                                  | 24.25       |
| Low                                     | 211,820 | 9.05            | 32.03           | 22.76                         | 28.77               | 13.32          | 32.51          | 8.27                                  | 29.21       |
| Very low                                | 10,253  | 7.47            | 33.28           | 23.95                         | 27.23               | 18.19          | 37.24          | 7.59                                  | 36.08       |

<sup>1</sup>Stratified into four categories of pharmaceutical copayment: Very low (unemployed or recipient of social rescue aids), low (annual income < 18,000 €), moderate (annual income 18,000 to 100,000 €), and high (annual income >100,000 €).

Categorical outcomes were transformed to binary variables using the 95th percentile of the given variable among the target population as cutoff: hospital admission (i.e., one or more admissions), non-scheduled hospitalization (i.e., one or more admissions), admission to a skilled nursing facility for intermediate care (i.e., one or more admissions), admission to emergency room (i.e., more than two admissions), visit to primary care services (i.e., more than 21 visits), medication use (i.e., dispensation of more than 13 drugs belonging to different 5-digit group of the anatomic-therapeutic classification), expenditure (i.e., healthcare cost above 4,315.1 €)

**Table S8.** Characteristics of the study population and rate of occurrence of each of the investigated outcomes. Subgroup chronic obstructive pulmonary disease. Outcome results are presented as percentages.

|                                         | No.     | All-cause death | Hospitalization | Non-scheduled hospitalization | Primary care visits | ER utilization | Medication use | Admission to skilled nursing facility | Expenditure |
|-----------------------------------------|---------|-----------------|-----------------|-------------------------------|---------------------|----------------|----------------|---------------------------------------|-------------|
| <b>Gender</b>                           |         |                 |                 |                               |                     |                |                |                                       |             |
| Male                                    | 216,963 | 5.93            | 28.06           | 18.52                         | 20.16               | 12.08          | 24.80          | 4.69                                  | 25.05       |
| Female                                  | 141,026 | 4.94            | 25.08           | 16.45                         | 22.85               | 12.66          | 30.72          | 5.36                                  | 22.43       |
| <b>Age group</b>                        |         |                 |                 |                               |                     |                |                |                                       |             |
| 0-14                                    | 13,767  | 0.03            | 7.11            | 4.12                          | 7.02                | 14.47          | 0.52           | 0.00                                  | 2.96        |
| 15-24                                   | 5,047   | 0.20            | 7.03            | 4.28                          | 2.56                | 9.71           | 1.62           | 0.08                                  | 5.03        |
| 25-34                                   | 5,934   | 0.15            | 12.30           | 7.89                          | 5.34                | 12.62          | 3.35           | 0.10                                  | 7.40        |
| 35-39                                   | 5,743   | 0.30            | 12.50           | 7.54                          | 6.95                | 11.20          | 5.69           | 0.16                                  | 9.09        |
| 40-44                                   | 8,868   | 0.64            | 12.37           | 6.71                          | 8.15                | 9.10           | 7.07           | 0.30                                  | 10.98       |
| 45-49                                   | 12,346  | 0.88            | 14.23           | 7.39                          | 9.27                | 9.25           | 10.36          | 0.50                                  | 14.39       |
| 50-54                                   | 18,854  | 1.38            | 17.04           | 9.35                          | 10.76               | 8.92           | 13.19          | 0.90                                  | 17.11       |
| 55-59                                   | 26,953  | 1.77            | 19.62           | 11.04                         | 11.46               | 8.33           | 15.80          | 1.34                                  | 18.62       |
| 60-64                                   | 33,670  | 2.30            | 21.62           | 12.09                         | 13.36               | 8.63           | 19.52          | 1.77                                  | 19.62       |
| 65-69                                   | 41,781  | 2.97            | 24.92           | 13.92                         | 15.71               | 9.51           | 25.09          | 2.37                                  | 22.04       |
| 70-74                                   | 47,067  | 3.69            | 28.87           | 16.67                         | 20.43               | 11.28          | 31.15          | 3.34                                  | 25.73       |
| 75-79                                   | 40,738  | 5.64            | 34.14           | 21.25                         | 27.92               | 13.94          | 38.28          | 5.53                                  | 30.80       |
| 80-84                                   | 45,631  | 8.82            | 36.86           | 26.29                         | 34.60               | 16.25          | 41.79          | 8.87                                  | 33.50       |
| 85-89                                   | 32,745  | 13.63           | 38.96           | 31.97                         | 38.15               | 17.90          | 43.32          | 13.43                                 | 35.35       |
| 90-94                                   | 14,916  | 21.37           | 39.68           | 35.36                         | 37.25               | 17.50          | 39.90          | 17.00                                 | 33.15       |
| >95                                     | 3,929   | 29.75           | 36.50           | 33.67                         | 32.58               | 14.53          | 32.88          | 17.97                                 | 27.74       |
| <b>Socioeconomic status<sup>1</sup></b> |         |                 |                 |                               |                     |                |                |                                       |             |
| High                                    | 1,668   | 3.72            | 12.23           | 7.73                          | 5.64                | 4.08           | 12.05          | 0.84                                  | 11.45       |
| Moderate                                | 91,281  | 3.72            | 21.71           | 12.86                         | 14.75               | 8.50           | 19.95          | 2.74                                  | 18.11       |
| Low                                     | 246,130 | 6.30            | 28.89           | 19.51                         | 23.74               | 13.41          | 29.70          | 5.83                                  | 25.96       |
| Very low                                | 18,910  | 4.60            | 27.12           | 18.49                         | 21.02               | 17.13          | 29.77          | 4.60                                  | 28.36       |

<sup>1</sup>Stratified into four categories of pharmaceutical copayment: Very low (unemployed or recipient of social rescue aids), low (annual income < 18,000 €), moderate (annual income 18,000 to 100,000 €), and high (annual income >100,000 €).

Categorical outcomes were transformed to binary variables using the 95th percentile of the given variable among the target population as cutoff: hospital admission (i.e., one or more admissions), non-scheduled hospitalization (i.e., one or more admissions), admission to a skilled nursing facility for intermediate care (i.e., one or more admissions), admission to emergency room (i.e., more than two admissions), visit to primary care services (i.e., more than 21 visits), medication use (i.e., dispensation of more than 13 drugs belonging to different 5-digit group of the anatomic-therapeutic classification), expenditure (i.e., healthcare cost above 4,315.1 €)

**Table S9.** Characteristics of the study population and rate of occurrence of each of the investigated outcomes. Subgroup cirrhosis. Outcome results are presented as percentages.

|                                         | No.    | All-cause death | Hospitalization | Non-scheduled hospitalization | Primary care visits | ER utilization | Medication use | Admission to skilled nursing facility | Expenditure |
|-----------------------------------------|--------|-----------------|-----------------|-------------------------------|---------------------|----------------|----------------|---------------------------------------|-------------|
| <b>Gender</b>                           |        |                 |                 |                               |                     |                |                |                                       |             |
| Male                                    | 18,814 | 23.68           | 37.37           | 32.81                         | 19.91               | 16.19          | 36.52          | 15.68                                 | 32.58       |
| Female                                  | 48,642 | 19.21           | 27.84           | 24.87                         | 15.87               | 10.42          | 33.13          | 12.04                                 | 22.45       |
| <b>Age group</b>                        |        |                 |                 |                               |                     |                |                |                                       |             |
| 65-69                                   | 2,632  | 8.40            | 26.63           | 20.10                         | 15.43               | 12.88          | 29.33          | 9.88                                  | 27.85       |
| 70-74                                   | 3,964  | 10.22           | 27.22           | 21.54                         | 17.33               | 12.46          | 33.60          | 10.82                                 | 28.30       |
| 75-79                                   | 5,590  | 14.67           | 33.02           | 27.42                         | 19.36               | 14.47          | 37.48          | 14.78                                 | 31.09       |
| 80-84                                   | 12,587 | 17.25           | 32.52           | 28.16                         | 19.39               | 13.85          | 38.52          | 14.09                                 | 29.40       |
| 85-89                                   | 18,934 | 20.53           | 32.41           | 29.34                         | 18.33               | 12.52          | 36.55          | 13.90                                 | 26.52       |
| 90-94                                   | 16,383 | 24.73           | 29.69           | 27.54                         | 15.67               | 10.90          | 31.81          | 12.61                                 | 21.69       |
| >95                                     | 7,366  | 30.45           | 25.14           | 23.59                         | 11.04               | 7.78           | 24.50          | 11.15                                 | 16.02       |
| <b>Socioeconomic status<sup>1</sup></b> |        |                 |                 |                               |                     |                |                |                                       |             |
| High                                    | 124    | 16.13           | 24.19           | 21.77                         | 14.52               | 6.45           | 33.06          | 8.87                                  | 20.97       |
| Moderate                                | 8,606  | 19.61           | 29.08           | 25.28                         | 15.91               | 11.82          | 33.89          | 12.03                                 | 25.02       |
| Low                                     | 55,944 | 20.77           | 30.80           | 27.46                         | 17.32               | 12.07          | 34.20          | 13.26                                 | 25.31       |
| Very low                                | 2,782  | 16.89           | 29.12           | 25.27                         | 14.09               | 12.15          | 32.06          | 12.37                                 | 25.63       |

<sup>1</sup>Stratified into four categories of pharmaceutical copayment: Very low (unemployed or recipient of social rescue aids), low (annual income < 18,000 €), moderate (annual income 18,000 to 100,000 €), and high (annual income >100,000 €).

Categorical outcomes were transformed to binary variables using the 95th percentile of the given variable among the target population as cutoff: hospital admission (i.e., one or more admissions), non-scheduled hospitalization (i.e., one or more admissions), admission to a skilled nursing facility for intermediate care (i.e., one or more admissions), admission to emergency room (i.e., more than two admissions), visit to primary care services (i.e., more than 21 visits), medication use (i.e., dispensation of more than 13 drugs belonging to different 5-digit group of the anatomic-therapeutic classification), expenditure (i.e., healthcare cost above 4,315.1 €)

**Table S10:** Performance of each model for multimorbidity measurement for explaining the selected outcomes, measured using four statistics. General adult population (i.e., aged  $\geq 18$  years)

|                                                       |                 | Age + Gender +<br>socioeconomic<br>status | + CCI | + QOF | + Karolinska | + HCUP | + GMA |
|-------------------------------------------------------|-----------------|-------------------------------------------|-------|-------|--------------|--------|-------|
| <b>All-cause<br/>death</b>                            | AIC             | 54.8                                      | 47.1  | 50.4  | 51.3         | 49.9   | 45.5  |
|                                                       | pR <sup>2</sup> | 25.2                                      | 35.8  | 31.2  | 30.1         | 31.9   | 37.9  |
|                                                       | AUC ROC         | 0.902                                     | 0.947 | 0.928 | 0.925        | 0.933  | 0.952 |
|                                                       | AUC_PR          | 0.097                                     | 0.202 | 0.164 | 0.149        | 0.165  | 0.237 |
| <b>Hospitalizati<br/>on</b>                           | AIC             | 347.2                                     | 328.1 | 329.2 | 315.9        | 314.2  | 282.9 |
|                                                       | pR <sup>2</sup> | 7.5                                       | 12.6  | 12.3  | 15.9         | 16.3   | 24.6  |
|                                                       | AUC ROC         | 0.700                                     | 0.751 | 0.749 | 0.788        | 0.789  | 0.846 |
|                                                       | AUC_PR          | 0.194                                     | 0.287 | 0.281 | 0.318        | 0.328  | 0.460 |
| <b>Non-<br/>scheduled<br/>hospitalizati<br/>on</b>    | AIC             | 205.1                                     | 188.2 | 187.8 | 183.8        | 181.1  | 151.3 |
|                                                       | pR <sup>2</sup> | 9.5                                       | 17.0  | 17.2  | 19.0         | 20.1   | 33.3  |
|                                                       | AUC ROC         | 0.736                                     | 0.801 | 0.800 | 0.818        | 0.825  | 0.897 |
|                                                       | AUC_PR          | 0.132                                     | 0.236 | 0.243 | 0.259        | 0.275  | 0.464 |
| <b>Skilled<br/>Nursing<br/>facility<br/>admission</b> | AIC             | 47.5                                      | 42.2  | 42.8  | 41.9         | 40.8   | 35.8  |
|                                                       | pR <sup>2</sup> | 25.5                                      | 33.9  | 32.9  | 34.3         | 36.1   | 43.9  |
|                                                       | AUC ROC         | 0.912                                     | 0.948 | 0.942 | 0.947        | 0.953  | 0.971 |
|                                                       | AUC_PR          | 0.078                                     | 0.154 | 0.155 | 0.167        | 0.184  | 0.291 |
| <b>ER<br/>utilization<br/>(&gt;2 visits)</b>          | AIC             | 208.7                                     | 200.3 | 198.4 | 188.4        | 188.4  | 173.9 |
|                                                       | pR <sup>2</sup> | 3.7                                       | 7.6   | 8.5   | 13.0         | 13.1   | 19.8  |
|                                                       | AUC ROC         | 0.655                                     | 0.714 | 0.723 | 0.781        | 0.780  | 0.838 |
|                                                       | AUC_PR          | 0.077                                     | 0.123 | 0.133 | 0.174        | 0.178  | 0.275 |
| <b>PC<br/>utilization<br/>(&gt; 21 visits)</b>        | AIC             | 214.1                                     | 203.4 | 193.9 | 182.8        | 184.6  | 179.1 |
|                                                       | pR <sup>2</sup> | 16.4                                      | 20.6  | 24.3  | 28.7         | 27.9   | 30.1  |
|                                                       | AUC ROC         | 0.803                                     | 0.836 | 0.857 | 0.890        | 0.887  | 0.904 |
|                                                       | AUC_PR          | 0.197                                     | 0.258 | 0.314 | 0.354        | 0.344  | 0.386 |
| <b>Medications<br/>(&gt;13 drugs)</b>                 | AIC             | 203.2                                     | 180.1 | 167.1 | 149.7        | 150.1  | 148.2 |
|                                                       | pR <sup>2</sup> | 21.0                                      | 30.0  | 35.1  | 41.8         | 41.7   | 42.4  |
|                                                       | AUC ROC         | 0.845                                     | 0.896 | 0.915 | 0.939        | 0.939  | 0.945 |
|                                                       | AUC_PR          | 0.203                                     | 0.350 | 0.428 | 0.506        | 0.504  | 0.530 |
| <b>Expenditure<br/>(&gt;4,315.1 €)</b>                | AIC             | 249.9                                     | 214.1 | 221.6 | 208.5        | 204.0  | 176.4 |
|                                                       | pR <sup>2</sup> | 10.6                                      | 23.4  | 20.7  | 25.4         | 27.0   | 36.9  |
|                                                       | AUC ROC         | 0.750                                     | 0.842 | 0.828 | 0.862        | 0.870  | 0.912 |
|                                                       | AUC_PR          | 0.159                                     | 0.356 | 0.313 | 0.365        | 0.388  | 0.541 |

---

**AUC\_PR:** area under the precision-recall. **AIC:** Akaike information criterion. **CCI:** Charlson Comorbidity Index. **ER:** emergency room. **GMA:** adjusted morbidity groups. **HCUP:** healthcare cost and utilization project of the US Agency for Healthcare Research and Quality. **PC:** primary care (>21 visits including general practitioner, nurse, and social worker, either at the primary care facility, home or via teleconsultation. **pR<sup>2</sup>:** pseudo-R squared.

Cells are colored according to the goodness of fit of each model for a given statistic, from red (worse) to strong green (best).

**Table S11:** Performance of each model for multimorbidity measurement for explaining the selected outcomes, measured using four statistics. People aged >64 years

|                                                   | Statistic       | Age + Gender<br>+<br>socioeconomic<br>status | + CCI | + QOF | +<br>Karolinska | + HCUP | + GMA |
|---------------------------------------------------|-----------------|----------------------------------------------|-------|-------|-----------------|--------|-------|
| <b>All-cause<br/>death</b>                        | AIC             | 42.6                                         | 37.3  | 39.2  | 40.0            | 39.0   | 35.8  |
|                                                   | pR <sup>2</sup> | 12.6                                         | 23.5  | 19.5  | 18.0            | 20.0   | 26.5  |
|                                                   | AUC<br>ROC      | 0.781                                        | 0.871 | 0.842 | 0.830           | 0.845  | 0.887 |
|                                                   | AUC_PR          | 0.137                                        | 0.232 | 0.198 | 0.184           | 0.201  | 0.270 |
| <b>Hospitalization</b>                            | AIC             | 140.3                                        | 130.3 | 130.3 | 125.0           | 124.0  | 108.4 |
|                                                   | pR <sup>2</sup> | 2.4                                          | 9.3   | 9.3   | 13.0            | 13.7   | 24.6  |
|                                                   | AUC<br>ROC      | 0.609                                        | 0.711 | 0.709 | 0.749           | 0.755  | 0.823 |
|                                                   | AUC_PR          | 0.255                                        | 0.386 | 0.384 | 0.425           | 0.438  | 0.593 |
| <b>Non-<br/>scheduled<br/>hospitalization</b>     | AIC             | 92.2                                         | 81.7  | 80.6  | 79.0            | 77.4   | 59.8  |
|                                                   | pR <sup>2</sup> | 5.7                                          | 16.4  | 17.6  | 19.3            | 20.9   | 38.8  |
|                                                   | AUC<br>ROC      | 0.681                                        | 0.797 | 0.800 | 0.812           | 0.823  | 0.908 |
|                                                   | AUC_PR          | 0.185                                        | 0.330 | 0.349 | 0.367           | 0.388  | 0.620 |
| <b>Skilled Nursing<br/>facility<br/>admission</b> | AIC             | 39.9                                         | 36.0  | 36.1  | 35.5            | 34.6   | 30.5  |
|                                                   | pR <sup>2</sup> | 9.6                                          | 18.4  | 18.2  | 19.7            | 21.7   | 31.0  |
|                                                   | AUC<br>ROC      | 0.756                                        | 0.843 | 0.837 | 0.848           | 0.863  | 0.913 |
|                                                   | AUC_PR          | 0.090                                        | 0.166 | 0.169 | 0.182           | 0.199  | 0.309 |
| <b>ER utilization<br/>(&gt;2 visits)</b>          | AIC             | 70.1                                         | 65.1  | 64.2  | 60.8            | 60.7   | 53.8  |
|                                                   | pR <sup>2</sup> | 2.4                                          | 9.3   | 10.6  | 15.3            | 15.5   | 25.1  |
|                                                   | AUC<br>ROC      | 0.622                                        | 0.737 | 0.744 | 0.794           | 0.795  | 0.859 |
|                                                   | AUC_PR          | 0.098                                        | 0.180 | 0.199 | 0.246           | 0.251  | 0.386 |
| <b>PC utilization<br/>(&gt; 21 visits)</b>        | AIC             | 117.9                                        | 111.5 | 105.8 | 101.5           | 102.8  | 99.1  |
|                                                   | pR <sup>2</sup> | 5.9                                          | 11.1  | 15.6  | 19.0            | 18.0   | 20.9  |
|                                                   | AUC<br>ROC      | 0.676                                        | 0.745 | 0.784 | 0.810           | 0.804  | 0.833 |
|                                                   | AUC_PR          | 0.246                                        | 0.322 | 0.386 | 0.422           | 0.410  | 0.455 |
| <b>Medications<br/>(&gt;13 drugs)</b>             | AIC             | 128.8                                        | 114.7 | 106.8 | 97.5            | 98.0   | 96.3  |
|                                                   | pR <sup>2</sup> | 3.5                                          | 14.1  | 20.0  | 27.0            | 26.6   | 27.8  |
|                                                   | AUC<br>ROC      | 0.633                                        | 0.776 | 0.811 | 0.853           | 0.852  | 0.867 |
|                                                   | AUC_PR          | 0.234                                        | 0.401 | 0.479 | 0.552           | 0.549  | 0.574 |



|                                        |                 |       |       |       |       |       |       |
|----------------------------------------|-----------------|-------|-------|-------|-------|-------|-------|
| <b>Expenditure<br/>(&gt;4,315.1 €)</b> | AIC             | 118.0 | 102.1 | 102.9 | 97.3  | 95.5  | 79.7  |
|                                        | pR <sup>2</sup> | 2.7   | 15.8  | 15.2  | 19.8  | 21.2  | 34.3  |
|                                        | AUC<br>ROC      | 0.620 | 0.782 | 0.772 | 0.806 | 0.817 | 0.881 |
|                                        | AUC_PR          | 0.202 | 0.407 | 0.395 | 0.450 | 0.469 | 0.636 |

**AUC\_PR**: area under the precision-recall. **AIC**: Akaike information criterion. **CCI**: Charlson Comorbidity Index. **ER**: emergency room. **GMA**: adjusted morbidity groups. **HCUP**: healthcare cost and utilization project of the US Agency for Healthcare Research and Quality. **PC**: primary care (>21 visits including general practitioner, nurse, and social worker, either at the primary care facility, home or via teleconsultation. **pR<sup>2</sup>**: pseudo-R squared.

Cells are colored according to the goodness of fit of each model for a given statistic, from red (worse) to strong green (best).

**Table S12:** Performance of each model for multimorbidity measurement for explaining the selected outcomes, measured using four statistics. Ischemic heart disease

|                                                   | Statistic       | Age + Gender<br>+<br>socioeconomic<br>status | + CCI | + QOF | +<br>Karolinska | + HCUP | + GMA |
|---------------------------------------------------|-----------------|----------------------------------------------|-------|-------|-----------------|--------|-------|
| <b>All-cause<br/>death</b>                        | AIC             | 10.3                                         | 9.2   | 9.6   | 9.7             | 9.5    | 8.8   |
|                                                   | pR <sup>2</sup> | 11.1                                         | 20.5  | 17.7  | 16.1            | 18.2   | 24.1  |
|                                                   | AUC<br>ROC      | 0.756                                        | 0.840 | 0.820 | 0.806           | 0.823  | 0.864 |
|                                                   | AUC_PR          | 0.174                                        | 0.265 | 0.235 | 0.222           | 0.240  | 0.301 |
| <b>Hospitalization</b>                            | AIC             | 29.7                                         | 27.7  | 27.8  | 26.9            | 26.6   | 22.8  |
|                                                   | pR <sup>2</sup> | 1.7                                          | 8.1   | 7.9   | 10.8            | 11.8   | 24.3  |
|                                                   | AUC<br>ROC      | 0.588                                        | 0.692 | 0.687 | 0.719           | 0.729  | 0.815 |
|                                                   | AUC_PR          | 0.368                                        | 0.501 | 0.499 | 0.536           | 0.550  | 0.699 |
| <b>Non-<br/>scheduled<br/>hospitalization</b>     | AIC             | 24.6                                         | 22.6  | 22.5  | 22.1            | 21.7   | 17.7  |
|                                                   | pR <sup>2</sup> | 2.7                                          | 10.5  | 11.0  | 12.5            | 14.1   | 30.0  |
|                                                   | AUC<br>ROC      | 0.617                                        | 0.726 | 0.726 | 0.740           | 0.754  | 0.852 |
|                                                   | AUC_PR          | 0.286                                        | 0.420 | 0.432 | 0.454           | 0.473  | 0.664 |
| <b>Skilled Nursing<br/>facility<br/>admission</b> | AIC             | 9.0                                          | 8.2   | 8.1   | 8.0             | 7.8    | 6.9   |
|                                                   | pR <sup>2</sup> | 10.8                                         | 18.9  | 19.2  | 20.4            | 22.7   | 31.5  |
|                                                   | AUC<br>ROC      | 0.759                                        | 0.837 | 0.838 | 0.844           | 0.860  | 0.906 |
|                                                   | AUC_PR          | 0.128                                        | 0.204 | 0.213 | 0.230           | 0.250  | 0.359 |
| <b>ER utilization<br/>(&gt;2 visits)</b>          | AIC             | 18.2                                         | 17.2  | 16.9  | 16.1            | 16.1   | 14.3  |
|                                                   | pR <sup>2</sup> | 2.0                                          | 7.8   | 9.1   | 13.5            | 13.6   | 23.4  |
|                                                   | AUC<br>ROC      | 0.603                                        | 0.708 | 0.718 | 0.763           | 0.764  | 0.832 |
|                                                   | AUC_PR          | 0.167                                        | 0.259 | 0.281 | 0.336           | 0.339  | 0.477 |
| <b>PC utilization<br/>(&gt; 21 visits)</b>        | AIC             | 25.2                                         | 24.2  | 23.2  | 22.5            | 22.7   | 22.1  |
|                                                   | pR <sup>2</sup> | 6.2                                          | 10.0  | 13.7  | 16.4            | 15.5   | 18.0  |
|                                                   | AUC<br>ROC      | 0.671                                        | 0.722 | 0.758 | 0.780           | 0.772  | 0.796 |
|                                                   | AUC_PR          | 0.351                                        | 0.412 | 0.468 | 0.499           | 0.488  | 0.525 |
| <b>Medications<br/>(&gt;13 drugs)</b>             | AIC             | 29.0                                         | 26.4  | 25.4  | 23.6            | 23.8   | 23.3  |
|                                                   | pR <sup>2</sup> | 6.3                                          | 14.8  | 17.8  | 23.6            | 23.2   | 24.6  |
|                                                   | AUC<br>ROC      | 0.660                                        | 0.762 | 0.781 | 0.820           | 0.818  | 0.830 |
|                                                   | AUC_PR          | 0.448                                        | 0.578 | 0.617 | 0.674           | 0.670  | 0.689 |

|                                        |                 |       |       |       |       |       |       |
|----------------------------------------|-----------------|-------|-------|-------|-------|-------|-------|
| <b>Expenditure<br/>(&gt;4,315.1 €)</b> | AIC             | 28.6  | 25.5  | 25.7  | 24.5  | 24.0  | 20.2  |
|                                        | pR <sup>2</sup> | 1.6   | 12.5  | 11.6  | 16.0  | 17.5  | 30.6  |
|                                        | AUC<br>ROC      | 0.584 | 0.739 | 0.728 | 0.763 | 0.775 | 0.851 |
|                                        | AUC_PR          | 0.337 | 0.535 | 0.524 | 0.579 | 0.596 | 0.731 |

**AUC\_PR**: area under the precision-recall. **AIC**: Akaike information criterion. **CCI**: Charlson Comorbidity Index. **ER**: emergency room. **GMA**: adjusted morbidity groups. **HCUP**: healthcare cost and utilization project of the US Agency for Healthcare Research and Quality. **PC**: primary care (>21 visits including general practitioner, nurse, and social worker, either at the primary care facility, home or via teleconsultation. **pR<sup>2</sup>**: pseudo-R squared.

Cells are colored according to the goodness of fit of each model for a given statistic, from red (worse) to strong green (best).

**Table S13:** Performance of each model for multimorbidity measurement for explaining the selected outcomes, measured using four statistics. Cirrhosis

|                                                   | Statistic       | Age + Gender<br>+<br>socioeconomic<br>status | + CCI | + QOF | +<br>Karolinska | + HCUP | + GMA |
|---------------------------------------------------|-----------------|----------------------------------------------|-------|-------|-----------------|--------|-------|
| <b>All-cause<br/>death</b>                        | AIC             | 1.9                                          | 1.6   | 1.8   | 1.8             | 1.8    | 1.6   |
|                                                   | pR <sup>2</sup> | 9.2                                          | 23.4  | 14.6  | 14.4            | 16.4   | 26.1  |
|                                                   | AUC<br>ROC      | 0.731                                        | 0.862 | 0.790 | 0.790           | 0.809  | 0.884 |
|                                                   | AUC_PR          | 0.157                                        | 0.297 | 0.214 | 0.207           | 0.227  | 0.323 |
| <b>Hospitalization</b>                            | AIC             | 5.1                                          | 4.5   | 4.8   | 4.5             | 4.5    | 3.7   |
|                                                   | pR <sup>2</sup> | 4.8                                          | 15.4  | 10.9  | 15.4            | 16.2   | 31.2  |
|                                                   | AUC<br>ROC      | 0.648                                        | 0.768 | 0.722 | 0.764           | 0.770  | 0.857 |
|                                                   | AUC_PR          | 0.390                                        | 0.558 | 0.506 | 0.556           | 0.571  | 0.735 |
| <b>Non-<br/>scheduled<br/>hospitalization</b>     | AIC             | 4.1                                          | 3.5   | 3.7   | 3.5             | 3.5    | 2.6   |
|                                                   | pR <sup>2</sup> | 5.6                                          | 18.0  | 13.7  | 17.6            | 19.0   | 38.5  |
|                                                   | AUC<br>ROC      | 0.666                                        | 0.802 | 0.754 | 0.790           | 0.798  | 0.901 |
|                                                   | AUC_PR          | 0.290                                        | 0.459 | 0.428 | 0.466           | 0.488  | 0.706 |
| <b>Skilled Nursing<br/>facility<br/>admission</b> | AIC             | 1.5                                          | 1.3   | 1.4   | 1.4             | 1.3    | 1.2   |
|                                                   | pR <sup>2</sup> | 10.4                                         | 21.3  | 17.6  | 19.7            | 21.6   | 30.6  |
|                                                   | AUC<br>ROC      | 0.755                                        | 0.857 | 0.827 | 0.843           | 0.858  | 0.910 |
|                                                   | AUC_PR          | 0.124                                        | 0.217 | 0.191 | 0.211           | 0.227  | 0.327 |
| <b>ER utilization<br/>(&gt;2 visits)</b>          | AIC             | 3.3                                          | 3.0   | 3.1   | 2.9             | 2.9    | 2.5   |
|                                                   | pR <sup>2</sup> | 3.3                                          | 10.7  | 9.6   | 14.9            | 15.3   | 26.4  |
|                                                   | AUC<br>ROC      | 0.632                                        | 0.745 | 0.723 | 0.778           | 0.780  | 0.855 |
|                                                   | AUC_PR          | 0.183                                        | 0.284 | 0.284 | 0.343           | 0.355  | 0.505 |
| <b>PC utilization<br/>(&gt; 21 visits)</b>        | AIC             | 3.5                                          | 3.3   | 3.2   | 3.1             | 3.1    | 3.0   |
|                                                   | pR <sup>2</sup> | 7.7                                          | 12.1  | 15.2  | 18.9            | 18.3   | 20.8  |
|                                                   | AUC<br>ROC      | 0.699                                        | 0.752 | 0.778 | 0.808           | 0.805  | 0.828 |
|                                                   | AUC_PR          | 0.268                                        | 0.327 | 0.380 | 0.415           | 0.409  | 0.447 |
| <b>Medications<br/>(&gt;13 drugs)</b>             | AIC             | 4.0                                          | 3.6   | 3.4   | 3.1             | 3.1    | 3.1   |
|                                                   | pR <sup>2</sup> | 9.0                                          | 18.0  | 23.5  | 29.4            | 29.6   | 30.2  |
|                                                   | AUC<br>ROC      | 0.706                                        | 0.797 | 0.831 | 0.864           | 0.866  | 0.875 |
|                                                   | AUC_PR          | 0.326                                        | 0.455 | 0.540 | 0.595           | 0.596  | 0.609 |

|                                        |                 |       |       |       |       |       |       |
|----------------------------------------|-----------------|-------|-------|-------|-------|-------|-------|
| <b>Expenditure<br/>(&gt;4,315.1 €)</b> | AIC             | 5.0   | 4.1   | 4.5   | 4.2   | 4.1   | 3.3   |
|                                        | pR <sup>2</sup> | 5.1   | 23.3  | 14.8  | 20.3  | 22.6  | 37.3  |
|                                        | AUC<br>ROC      | 0.649 | 0.825 | 0.759 | 0.799 | 0.814 | 0.887 |
|                                        | AUC_PR          | 0.373 | 0.635 | 0.543 | 0.602 | 0.630 | 0.772 |

**AUC\_PR:** area under the precision-recall. **AIC:** Akaike information criterion. **CCI:** Charlson Comorbidity Index. **ER:** emergency room. **GMA:** adjusted morbidity groups. **HCUP:** healthcare cost and utilization project of the US Agency for Healthcare Research and Quality. **PC:** primary care (>21 visits including general practitioner, nurse, and social worker, either at the primary care facility, home or via teleconsultation. **pR<sup>2</sup>:** pseudo-R squared.

Cells are colored according to the goodness of fit of each model for a given statistic, from red (worse) to strong green (best).

**Table S14:** Performance of each model for multimorbidity measurement for explaining the selected outcomes, measured using four statistics. Dementia

|                                           | Statistic       | Age + Gender<br>+<br>socioeconomic status | + CCI | + QOF | +<br>Karolinska | + HCUP | + GMA |
|-------------------------------------------|-----------------|-------------------------------------------|-------|-------|-----------------|--------|-------|
| <b>All-cause death</b>                    | AIC             | 8.8                                       | 8.5   | 8.6   | 8.6             | 8.6    | 8.2   |
|                                           | pR <sup>2</sup> | 5.8                                       | 8.7   | 7.8   | 7.4             | 8.0    | 12.0  |
|                                           | AUC ROC         | 0.668                                     | 0.708 | 0.698 | 0.693           | 0.700  | 0.747 |
|                                           | AUC_P R         | 0.281                                     | 0.325 | 0.310 | 0.305           | 0.311  | 0.364 |
| <b>Hospitalization</b>                    | AIC             | 12.2                                      | 11.4  | 11.4  | 11.1            | 11.0   | 8.8   |
|                                           | pR <sup>2</sup> | 1.5                                       | 7.5   | 7.7   | 10.7            | 11.1   | 29.3  |
|                                           | AUC ROC         | 0.577                                     | 0.687 | 0.687 | 0.720           | 0.725  | 0.847 |
|                                           | AUC_P R         | 0.362                                     | 0.484 | 0.487 | 0.522           | 0.531  | 0.729 |
| <b>Non-scheduled hospitalization</b>      | AIC             | 11.2                                      | 10.5  | 10.4  | 10.2            | 10.1   | 7.7   |
|                                           | pR <sup>2</sup> | 2.0                                       | 8.4   | 9.2   | 11.4            | 12.2   | 32.9  |
|                                           | AUC ROC         | 0.593                                     | 0.703 | 0.706 | 0.729           | 0.738  | 0.870 |
|                                           | AUC_P R         | 0.320                                     | 0.438 | 0.451 | 0.476           | 0.489  | 0.715 |
| <b>Skilled Nursing facility admission</b> | AIC             | 8.6                                       | 8.2   | 8.2   | 8.1             | 8.0    | 7.3   |
|                                           | pR <sup>2</sup> | 2.0                                       | 5.7   | 5.6   | 7.3             | 8.2    | 16.2  |
|                                           | AUC ROC         | 0.595                                     | 0.673 | 0.670 | 0.695           | 0.707  | 0.789 |
|                                           | AUC_P R         | 0.202                                     | 0.266 | 0.264 | 0.286           | 0.298  | 0.403 |
| <b>ER utilization (&gt;2 visits)</b>      | AIC             | 7.9                                       | 7.5   | 7.4   | 7.1             | 7.1    | 6.1   |
|                                           | pR <sup>2</sup> | 1.1                                       | 6.2   | 7.6   | 11.3            | 11.4   | 23.8  |
|                                           | AUC ROC         | 0.575                                     | 0.687 | 0.699 | 0.741           | 0.742  | 0.835 |
|                                           | AUC_P R         | 0.170                                     | 0.253 | 0.276 | 0.319           | 0.323  | 0.488 |
| <b>PC utilization (&gt; 21 visits)</b>    | AIC             | 11.4                                      | 11.1  | 10.8  | 10.5            | 10.6   | 10.2  |
|                                           | pR <sup>2</sup> | 1.2                                       | 4.4   | 6.3   | 9.1             | 8.3    | 11.9  |
|                                           | AUC ROC         | 0.567                                     | 0.652 | 0.675 | 0.710           | 0.701  | 0.746 |
|                                           | AUC_P R         | 0.303                                     | 0.375 | 0.409 | 0.443           | 0.433  | 0.483 |

|                                        |                 |       |       |       |       |       |       |
|----------------------------------------|-----------------|-------|-------|-------|-------|-------|-------|
| <b>Medications<br/>(&gt;13 drugs)</b>  | AIC             | 11.9  | 11.0  | 10.4  | 9.9   | 9.9   | 9.7   |
|                                        | pR <sup>2</sup> | 1.4   | 9.0   | 13.4  | 17.7  | 17.6  | 19.1  |
|                                        | AUC<br>ROC      | 0.568 | 0.714 | 0.747 | 0.781 | 0.781 | 0.796 |
|                                        | AUC_P<br>R      | 0.325 | 0.477 | 0.536 | 0.583 | 0.582 | 0.605 |
| <b>Expenditure<br/>(&gt;4,315.1 €)</b> | AIC             | 11.8  | 11.0  | 10.9  | 10.4  | 10.3  | 8.5   |
|                                        | pR <sup>2</sup> | 1.5   | 8.7   | 9.3   | 13.6  | 14.1  | 29.8  |
|                                        | AUC<br>ROC      | 0.580 | 0.702 | 0.705 | 0.747 | 0.751 | 0.851 |
|                                        | AUC_P<br>R      | 0.344 | 0.484 | 0.489 | 0.542 | 0.549 | 0.718 |

**AUC\_PR**: area under the precision-recall. **AIC**: Akaike information criterion. **CCI**: Charlson Comorbidity Index. **ER**: emergency room. **GMA**: adjusted morbidity groups. **HCUP**: healthcare cost and utilization project of the US Agency for Healthcare Research and Quality. **PC**: primary care (>21 visits including general practitioner, nurse, and social worker, either at the primary care facility, home or via teleconsultation. **pR<sup>2</sup>**: pseudo-R squared.

Cells are colored according to the goodness of fit of each model for a given statistic, from red (worse) to strong green (best).

**Table S15:** Performance of each model for multimorbidity measurement for explaining the selected outcomes, measured using four statistics. Diabetes

|                                                   | Statistic       | Age + Gender<br>+<br>socioeconomic<br>status | + CCI | + QOF | +<br>Karolinska | + HCUP | + GMA |
|---------------------------------------------------|-----------------|----------------------------------------------|-------|-------|-----------------|--------|-------|
| <b>All-cause<br/>death</b>                        | AIC             | 17.0                                         | 14.7  | 15.5  | 15.8            | 15.3   | 14.0  |
|                                                   | pR <sup>2</sup> | 13.3                                         | 25.2  | 20.8  | 19.7            | 22.2   | 28.7  |
|                                                   | AUC<br>ROC      | 0.788                                        | 0.882 | 0.852 | 0.844           | 0.862  | 0.901 |
|                                                   | AUC_PR          | 0.142                                        | 0.246 | 0.207 | 0.196           | 0.217  | 0.283 |
| <b>Hospitalization</b>                            | AIC             | 59.3                                         | 54.7  | 55.1  | 52.9            | 52.1   | 45.3  |
|                                                   | pR <sup>2</sup> | 3.2                                          | 10.8  | 10.2  | 13.8            | 15.0   | 26.1  |
|                                                   | AUC<br>ROC      | 0.626                                        | 0.728 | 0.717 | 0.754           | 0.764  | 0.831 |
|                                                   | AUC_PR          | 0.296                                        | 0.436 | 0.429 | 0.470           | 0.489  | 0.637 |
| <b>Non-<br/>scheduled<br/>hospitalization</b>     | AIC             | 42.0                                         | 37.2  | 36.9  | 36.1            | 35.1   | 27.5  |
|                                                   | pR <sup>2</sup> | 5.3                                          | 16.2  | 16.8  | 18.6            | 21.0   | 38.2  |
|                                                   | AUC<br>ROC      | 0.671                                        | 0.790 | 0.789 | 0.802           | 0.819  | 0.903 |
|                                                   | AUC_PR          | 0.216                                        | 0.367 | 0.385 | 0.404           | 0.432  | 0.645 |
| <b>Skilled Nursing<br/>facility<br/>admission</b> | AIC             | 16.3                                         | 14.6  | 14.8  | 14.5            | 14.0   | 12.4  |
|                                                   | pR <sup>2</sup> | 11.7                                         | 20.8  | 20.1  | 21.7            | 24.3   | 32.9  |
|                                                   | AUC<br>ROC      | 0.777                                        | 0.860 | 0.851 | 0.861           | 0.878  | 0.921 |
|                                                   | AUC_PR          | 0.105                                        | 0.184 | 0.187 | 0.202           | 0.224  | 0.327 |
| <b>ER utilization<br/>(&gt;2 visits)</b>          | AIC             | 33.1                                         | 30.7  | 30.4  | 28.8            | 28.6   | 25.4  |
|                                                   | pR <sup>2</sup> | 2.3                                          | 9.3   | 10.3  | 15.0            | 15.7   | 25.0  |
|                                                   | AUC<br>ROC      | 0.616                                        | 0.735 | 0.738 | 0.785           | 0.790  | 0.851 |
|                                                   | AUC_PR          | 0.121                                        | 0.212 | 0.231 | 0.283           | 0.292  | 0.425 |
| <b>PC utilization<br/>(&gt; 21 visits)</b>        | AIC             | 55.2                                         | 52.8  | 51.4  | 49.2            | 49.5   | 48.0  |
|                                                   | pR <sup>2</sup> | 5.7                                          | 9.7   | 12.2  | 16.0            | 15.4   | 17.9  |
|                                                   | AUC<br>ROC      | 0.668                                        | 0.723 | 0.745 | 0.780           | 0.776  | 0.804 |
|                                                   | AUC_PR          | 0.305                                        | 0.370 | 0.417 | 0.457           | 0.448  | 0.488 |
| <b>Medications<br/>(&gt;13 drugs)</b>             | AIC             | 60.4                                         | 54.7  | 52.0  | 47.2            | 47.4   | 46.6  |
|                                                   | pR <sup>2</sup> | 6.7                                          | 15.6  | 19.7  | 27.1            | 26.8   | 28.0  |
|                                                   | AUC<br>ROC      | 0.672                                        | 0.776 | 0.802 | 0.846           | 0.846  | 0.858 |



|                                        |                 |       |       |       |       |       |       |
|----------------------------------------|-----------------|-------|-------|-------|-------|-------|-------|
|                                        | AUC_PR          | 0.351 | 0.498 | 0.558 | 0.629 | 0.627 | 0.648 |
| <b>Expenditure<br/>(&gt;4,315.1 €)</b> | AIC             | 55.8  | 47.9  | 48.8  | 45.8  | 44.5  | 37.6  |
|                                        | pR <sup>2</sup> | 2.7   | 16.5  | 14.9  | 20.1  | 22.4  | 34.5  |
|                                        | AUC<br>ROC      | 0.615 | 0.783 | 0.765 | 0.803 | 0.819 | 0.878 |
|                                        | AUC_PR          | 0.257 | 0.481 | 0.461 | 0.522 | 0.547 | 0.690 |

**AUC\_PR:** area under the precision-recall. **AIC:** Akaike information criterion. **CCI:** Charlson Comorbidity Index. **ER:** emergency room. **GMA:** adjusted morbidity groups. **HCUP:** healthcare cost and utilization project of the US Agency for Healthcare Research and Quality. **PC:** primary care (>21 visits including general practitioner, nurse, and social worker, either at the primary care facility, home or via teleconsultation). **pR<sup>2</sup>:** pseudo-R squared.

Cells are colored according to the goodness of fit of each model for a given statistic, from red (worse) to strong green (best).

**Table S16:** Performance of each model for multimorbidity measurement for explaining the selected outcomes, measured using four statistics. Heart failure

|                                                   | Statistic       | Age + Gender<br>+<br>socioeconomic<br>status | + CCI | + QOF | +<br>Karolinska | + HCUP | + GMA |
|---------------------------------------------------|-----------------|----------------------------------------------|-------|-------|-----------------|--------|-------|
| <b>All-cause<br/>death</b>                        | AIC             | 14.1                                         | 13.2  | 13.6  | 13.7            | 13.5   | 12.6  |
|                                                   | pR <sup>2</sup> | 9.1                                          | 14.6  | 12.1  | 11.6            | 13.1   | 18.6  |
|                                                   | AUC<br>ROC      | 0.717                                        | 0.776 | 0.753 | 0.747           | 0.763  | 0.813 |
|                                                   | AUC_PR          | 0.237                                        | 0.302 | 0.273 | 0.265           | 0.280  | 0.339 |
| <b>Hospitalization</b>                            | AIC             | 27.4                                         | 26.1  | 26.2  | 25.3            | 25.0   | 20.3  |
|                                                   | pR <sup>2</sup> | 3.2                                          | 7.8   | 7.5   | 10.4            | 11.7   | 28.2  |
|                                                   | AUC<br>ROC      | 0.603                                        | 0.685 | 0.681 | 0.713           | 0.725  | 0.837 |
|                                                   | AUC_PR          | 0.470                                        | 0.569 | 0.564 | 0.605           | 0.619  | 0.785 |
| <b>Non-<br/>scheduled<br/>hospitalization</b>     | AIC             | 25.2                                         | 23.9  | 23.8  | 23.3            | 22.9   | 17.8  |
|                                                   | pR <sup>2</sup> | 3.9                                          | 8.9   | 9.3   | 11.3            | 12.8   | 32.2  |
|                                                   | AUC<br>ROC      | 0.620                                        | 0.702 | 0.704 | 0.724           | 0.738  | 0.862 |
|                                                   | AUC_PR          | 0.395                                        | 0.494 | 0.501 | 0.533           | 0.550  | 0.754 |
| <b>Skilled Nursing<br/>facility<br/>admission</b> | AIC             | 13.1                                         | 12.5  | 12.5  | 12.3            | 12.1   | 10.8  |
|                                                   | pR <sup>2</sup> | 7.5                                          | 11.9  | 11.7  | 13.4            | 14.9   | 24.0  |
|                                                   | AUC<br>ROC      | 0.692                                        | 0.753 | 0.749 | 0.768           | 0.782  | 0.849 |
|                                                   | AUC_PR          | 0.177                                        | 0.235 | 0.236 | 0.258           | 0.274  | 0.388 |
| <b>ER utilization<br/>(&gt;2 visits)</b>          | AIC             | 19.6                                         | 18.8  | 18.6  | 17.8            | 17.7   | 15.4  |
|                                                   | pR <sup>2</sup> | 1.5                                          | 5.3   | 6.1   | 10.4            | 10.8   | 22.7  |
|                                                   | AUC<br>ROC      | 0.584                                        | 0.668 | 0.676 | 0.727           | 0.730  | 0.821 |
|                                                   | AUC_PR          | 0.222                                        | 0.295 | 0.309 | 0.370           | 0.376  | 0.536 |
| <b>PC utilization<br/>(&gt; 21 visits)</b>        | AIC             | 26.1                                         | 25.7  | 25.2  | 24.6            | 24.8   | 24.2  |
|                                                   | pR <sup>2</sup> | 5.8                                          | 7.0   | 8.9   | 11.0            | 10.4   | 12.5  |
|                                                   | AUC<br>ROC      | 0.640                                        | 0.664 | 0.693 | 0.717           | 0.709  | 0.733 |
|                                                   | AUC_PR          | 0.460                                        | 0.486 | 0.522 | 0.554           | 0.544  | 0.577 |
| <b>Medications<br/>(&gt;13 drugs)</b>             | AIC             | 26.6                                         | 24.9  | 24.1  | 22.5            | 22.5   | 22.0  |
|                                                   | pR <sup>2</sup> | 6.5                                          | 12.3  | 15.3  | 20.8            | 21.0   | 22.6  |
|                                                   | AUC<br>ROC      | 0.639                                        | 0.730 | 0.753 | 0.796           | 0.797  | 0.810 |
|                                                   | AUC_PR          | 0.502                                        | 0.606 | 0.646 | 0.701           | 0.701  | 0.719 |

|                                        |                 |       |       |       |       |       |       |
|----------------------------------------|-----------------|-------|-------|-------|-------|-------|-------|
| <b>Expenditure<br/>(&gt;4,315.1 €)</b> | AIC             | 26.7  | 24.6  | 24.7  | 23.4  | 22.9  | 18.3  |
|                                        | pR <sup>2</sup> | 3.8   | 11.5  | 10.9  | 15.8  | 17.5  | 34.1  |
|                                        | AUC<br>ROC      | 0.611 | 0.725 | 0.718 | 0.760 | 0.773 | 0.869 |
|                                        | AUC_PR          | 0.448 | 0.592 | 0.581 | 0.643 | 0.658 | 0.803 |

**AUC\_PR:** area under the precision-recall. **AIC:** Akaike information criterion. **CCI:** Charlson Comorbidity Index. **ER:** emergency room. **GMA:** adjusted morbidity groups. **HCUP:** healthcare cost and utilization project of the US Agency for Healthcare Research and Quality. **PC:** primary care (>21 visits including general practitioner, nurse, and social worker, either at the primary care facility, home or via teleconsultation). **pR<sup>2</sup>:** pseudo-R squared.

Cells are colored according to the goodness of fit of each model for a given statistic, from red (worse) to strong green (best).

**Table S17:** Performance of each model for multimorbidity measurement for explaining the selected outcomes, measured using four statistics. Chronic kidney disease

|                                                   | Statistic       | Age + Gender<br>+<br>socioeconomic<br>status | + CCI | + QOF | +<br>Karolinska | + HCUP | + GMA |
|---------------------------------------------------|-----------------|----------------------------------------------|-------|-------|-----------------|--------|-------|
| <b>All-cause<br/>death</b>                        | AIC             | 15.0                                         | 13.4  | 13.8  | 14.0            | 13.6   | 12.5  |
|                                                   | pR <sup>2</sup> | 8.2                                          | 18.0  | 15.4  | 14.3            | 16.6   | 23.6  |
|                                                   | AUC<br>ROC      | 0.716                                        | 0.818 | 0.796 | 0.786           | 0.806  | 0.859 |
|                                                   | AUC_PR          | 0.182                                        | 0.279 | 0.252 | 0.240           | 0.260  | 0.331 |
| <b>Hospitalization</b>                            | AIC             | 34.9                                         | 32.2  | 32.2  | 31.0            | 30.4   | 25.0  |
|                                                   | pR <sup>2</sup> | 1.1                                          | 8.6   | 8.7   | 12.2            | 13.8   | 29.2  |
|                                                   | AUC<br>ROC      | 0.569                                        | 0.703 | 0.698 | 0.733           | 0.748  | 0.842 |
|                                                   | AUC_PR          | 0.359                                        | 0.509 | 0.511 | 0.554           | 0.572  | 0.741 |
| <b>Non-<br/>scheduled<br/>hospitalization</b>     | AIC             | 29.0                                         | 26.1  | 25.7  | 25.0            | 24.4   | 18.1  |
|                                                   | pR <sup>2</sup> | 2.4                                          | 12.0  | 13.5  | 15.7            | 18.0   | 39.2  |
|                                                   | AUC<br>ROC      | 0.608                                        | 0.749 | 0.755 | 0.771           | 0.790  | 0.899 |
|                                                   | AUC_PR          | 0.281                                        | 0.434 | 0.459 | 0.486           | 0.510  | 0.736 |
| <b>Skilled Nursing<br/>facility<br/>admission</b> | AIC             | 14.1                                         | 13.0  | 13.0  | 12.7            | 12.4   | 10.8  |
|                                                   | pR <sup>2</sup> | 6.2                                          | 13.7  | 14.0  | 15.6            | 17.9   | 28.1  |
|                                                   | AUC<br>ROC      | 0.689                                        | 0.786 | 0.787 | 0.800           | 0.819  | 0.882 |
|                                                   | AUC_PR          | 0.132                                        | 0.210 | 0.219 | 0.236           | 0.256  | 0.375 |
| <b>ER utilization<br/>(&gt;2 visits)</b>          | AIC             | 21.5                                         | 20.1  | 19.7  | 18.7            | 18.6   | 15.9  |
|                                                   | pR <sup>2</sup> | 1.0                                          | 7.5   | 9.2   | 13.7            | 14.4   | 26.6  |
|                                                   | AUC<br>ROC      | 0.570                                        | 0.712 | 0.721 | 0.766           | 0.773  | 0.851 |
|                                                   | AUC_PR          | 0.157                                        | 0.257 | 0.281 | 0.337           | 0.346  | 0.509 |
| <b>PC utilization<br/>(&gt; 21 visits)</b>        | AIC             | 31.8                                         | 30.6  | 29.3  | 28.5            | 28.7   | 27.8  |
|                                                   | pR <sup>2</sup> | 3.8                                          | 7.5   | 11.1  | 13.7            | 13.1   | 15.8  |
|                                                   | AUC<br>ROC      | 0.623                                        | 0.693 | 0.732 | 0.755           | 0.749  | 0.776 |
|                                                   | AUC_PR          | 0.340                                        | 0.410 | 0.468 | 0.500           | 0.490  | 0.530 |
| <b>Medications<br/>(&gt;13 drugs)</b>             | AIC             | 34.5                                         | 31.3  | 29.6  | 27.4            | 27.3   | 26.7  |
|                                                   | pR <sup>2</sup> | 2.0                                          | 11.3  | 16.0  | 22.4            | 22.5   | 24.2  |
|                                                   | AUC<br>ROC      | 0.583                                        | 0.742 | 0.770 | 0.814           | 0.816  | 0.831 |
|                                                   | AUC_PR          | 0.362                                        | 0.528 | 0.591 | 0.650           | 0.650  | 0.672 |

|                                        |                 |       |       |       |       |       |       |
|----------------------------------------|-----------------|-------|-------|-------|-------|-------|-------|
| <b>Expenditure<br/>(&gt;4,315.1 €)</b> | AIC             | 33.6  | 29.6  | 29.6  | 27.7  | 27.0  | 21.8  |
|                                        | pR <sup>2</sup> | 1.1   | 12.9  | 12.9  | 18.4  | 20.6  | 36.0  |
|                                        | AUC<br>ROC      | 0.569 | 0.749 | 0.742 | 0.783 | 0.800 | 0.879 |
|                                        | AUC_PR          | 0.337 | 0.542 | 0.537 | 0.602 | 0.623 | 0.769 |

**AUC\_PR**: area under the precision-recall. **AIC**: Akaike information criterion. **CCI**: Charlson Comorbidity Index. **ER**: emergency room. **GMA**: adjusted morbidity groups. **HCUP**: healthcare cost and utilization project of the US Agency for Healthcare Research and Quality. **PC**: primary care (>21 visits including general practitioner, nurse, and social worker, either at the primary care facility, home or via teleconsultation. **pR<sup>2</sup>**: pseudo-R squared.

Cells are colored according to the goodness of fit of each model for a given statistic, from red (worse) to strong green (best).

**Table S18:** Performance of each model for multimorbidity measurement for explaining the selected outcomes, measured using four statistics. Chronic obstructive pulmonary disease

|                                                   | Statistic       | Age + Gender<br>+<br>socioeconomic<br>status | + CCI | + QOF | +<br>Karolinska | + HCUP | + GMA |
|---------------------------------------------------|-----------------|----------------------------------------------|-------|-------|-----------------|--------|-------|
| <b>All-cause<br/>death</b>                        | AIC             | 13.4                                         | 11.8  | 12.5  | 12.6            | 12.3   | 11.3  |
|                                                   | pR <sup>2</sup> | 12.9                                         | 23.4  | 18.6  | 17.7            | 20.0   | 26.5  |
|                                                   | AUC<br>ROC      | 0.777                                        | 0.864 | 0.827 | 0.821           | 0.839  | 0.885 |
|                                                   | AUC_PR          | 0.170                                        | 0.270 | 0.226 | 0.214           | 0.234  | 0.298 |
| <b>Hospitalization</b>                            | AIC             | 39.7                                         | 37.2  | 37.3  | 35.9            | 35.6   | 30.2  |
|                                                   | pR <sup>2</sup> | 4.8                                          | 10.8  | 10.6  | 13.9            | 14.7   | 27.5  |
|                                                   | AUC<br>ROC      | 0.647                                        | 0.725 | 0.720 | 0.751           | 0.758  | 0.837 |
|                                                   | AUC_PR          | 0.369                                        | 0.490 | 0.487 | 0.526           | 0.539  | 0.695 |
| <b>Non-<br/>scheduled<br/>hospitalization</b>     | AIC             | 31.3                                         | 28.7  | 28.5  | 27.8            | 27.3   | 21.4  |
|                                                   | pR <sup>2</sup> | 6.4                                          | 14.2  | 14.8  | 16.8            | 18.3   | 36.0  |
|                                                   | AUC<br>ROC      | 0.681                                        | 0.766 | 0.766 | 0.782           | 0.793  | 0.888 |
|                                                   | AUC_PR          | 0.290                                        | 0.414 | 0.429 | 0.453           | 0.472  | 0.681 |
| <b>Skilled Nursing<br/>facility<br/>admission</b> | AIC             | 12.3                                         | 11.3  | 11.4  | 11.2            | 10.9   | 9.7   |
|                                                   | pR <sup>2</sup> | 12.8                                         | 20.2  | 19.5  | 20.8            | 22.8   | 31.7  |
|                                                   | AUC<br>ROC      | 0.780                                        | 0.847 | 0.838 | 0.847           | 0.861  | 0.909 |
|                                                   | AUC_PR          | 0.136                                        | 0.207 | 0.211 | 0.225           | 0.243  | 0.348 |
| <b>ER utilization<br/>(&gt;2 visits)</b>          | AIC             | 26.1                                         | 24.8  | 24.5  | 23.4            | 23.3   | 20.6  |
|                                                   | pR <sup>2</sup> | 2.3                                          | 7.2   | 8.4   | 12.6            | 12.8   | 22.8  |
|                                                   | AUC<br>ROC      | 0.613                                        | 0.700 | 0.711 | 0.757           | 0.758  | 0.831 |
|                                                   | AUC_PR          | 0.169                                        | 0.247 | 0.267 | 0.318           | 0.323  | 0.464 |
| <b>PC utilization<br/>(&gt; 21 visits)</b>        | AIC             | 34.1                                         | 33.0  | 31.6  | 30.4            | 30.7   | 29.8  |
|                                                   | pR <sup>2</sup> | 7.9                                          | 10.9  | 14.7  | 17.9            | 17.1   | 19.6  |
|                                                   | AUC<br>ROC      | 0.695                                        | 0.732 | 0.768 | 0.794           | 0.788  | 0.813 |
|                                                   | AUC_PR          | 0.344                                        | 0.394 | 0.454 | 0.488           | 0.477  | 0.515 |
| <b>Medications<br/>(&gt;13 drugs)</b>             | AIC             | 37.6                                         | 34.7  | 32.5  | 29.9            | 30.0   | 29.5  |
|                                                   | pR <sup>2</sup> | 10.2                                         | 17.1  | 22.3  | 28.6            | 28.3   | 29.6  |
|                                                   | AUC<br>ROC      | 0.706                                        | 0.780 | 0.815 | 0.851           | 0.850  | 0.862 |
|                                                   | AUC_PR          | 0.422                                        | 0.534 | 0.603 | 0.665           | 0.662  | 0.681 |

|                                        |                 |       |       |       |       |       |       |
|----------------------------------------|-----------------|-------|-------|-------|-------|-------|-------|
| <b>Expenditure<br/>(&gt;4,315.1 €)</b> | AIC             | 37.4  | 33.0  | 33.4  | 31.4  | 30.8  | 25.3  |
|                                        | pR <sup>2</sup> | 5.3   | 16.5  | 15.4  | 20.4  | 21.9  | 36.0  |
|                                        | AUC<br>ROC      | 0.650 | 0.779 | 0.766 | 0.802 | 0.812 | 0.883 |
|                                        | AUC_PR          | 0.333 | 0.530 | 0.515 | 0.571 | 0.589 | 0.739 |

**AUC\_PR:** area under the precision-recall. **AIC:** Akaike information criterion. **CCI:** Charlson Comorbidity Index. **ER:** emergency room. **GMA:** adjusted morbidity groups. **HCUP:** healthcare cost and utilization project of the US Agency for Healthcare Research and Quality. **PC:** primary care (>21 visits including general practitioner, nurse, and social worker, either at the primary care facility, home or via teleconsultation. **pR<sup>2</sup>:** pseudo-R squared.

Cells are colored according to the goodness of fit of each model for a given statistic, from red (worse) to strong green (best).

**Table S19:** Performance of each model for multimorbidity measurement for explaining the selected outcomes, measured using four statistics. people aged >64 years and institutionalized in a nursing home for long-term care

|                                               | Statistic       | Age + Gender<br>+<br>socioeconomic status | + CCI | + QOF | +<br>Karolinska | + HCUP | + GMA |
|-----------------------------------------------|-----------------|-------------------------------------------|-------|-------|-----------------|--------|-------|
| <b>All-cause death</b>                        | AIC             | 6.7                                       | 6.4   | 6.5   | 6.5             | 6.5    | 6.3   |
|                                               | pR <sup>2</sup> | 2.7                                       | 5.8   | 5.3   | 4.5             | 4.8    | 8.2   |
|                                               | AUC<br>ROC      | 0.614                                     | 0.670 | 0.662 | 0.650           | 0.654  | 0.702 |
|                                               | AUC_PR          | 0.276                                     | 0.329 | 0.320 | 0.308           | 0.312  | 0.363 |
| <b>Hospitalization</b>                        | AIC             | 8.2                                       | 7.7   | 7.6   | 7.4             | 7.4    | 5.7   |
|                                               | pR <sup>2</sup> | 1.0                                       | 7.2   | 8.0   | 10.9            | 10.7   | 31.3  |
|                                               | AUC<br>ROC      | 0.566                                     | 0.685 | 0.692 | 0.721           | 0.720  | 0.857 |
|                                               | AUC_PR          | 0.358                                     | 0.481 | 0.493 | 0.530           | 0.529  | 0.747 |
| <b>Non-scheduled<br/>hospitalization</b>      | AIC             | 7.8                                       | 7.3   | 7.2   | 7.0             | 7.0    | 5.2   |
|                                               | pR <sup>2</sup> | 1.0                                       | 7.7   | 8.9   | 11.3            | 11.3   | 34.0  |
|                                               | AUC<br>ROC      | 0.567                                     | 0.695 | 0.703 | 0.727           | 0.727  | 0.874 |
|                                               | AUC_PR          | 0.319                                     | 0.446 | 0.464 | 0.496           | 0.499  | 0.738 |
| <b>Skilled Nursing<br/>facility admission</b> | AIC             | 5.2                                       | 5.0   | 5.0   | 4.9             | 4.9    | 4.4   |
|                                               | pR <sup>2</sup> | 0.6                                       | 4.6   | 5.0   | 7.0             | 7.1    | 15.7  |
|                                               | AUC<br>ROC      | 0.557                                     | 0.667 | 0.668 | 0.698           | 0.701  | 0.795 |
|                                               | AUC_PR          | 0.154                                     | 0.219 | 0.221 | 0.247           | 0.247  | 0.353 |
| <b>ER utilization (&gt;2<br/>visits)</b>      | AIC             | 4.9                                       | 4.6   | 4.6   | 4.4             | 4.4    | 3.7   |
|                                               | pR <sup>2</sup> | 1.3                                       | 6.9   | 8.3   | 12.1            | 11.8   | 26.5  |
|                                               | AUC<br>ROC      | 0.581                                     | 0.702 | 0.711 | 0.753           | 0.750  | 0.853 |
|                                               | AUC_PR          | 0.153                                     | 0.237 | 0.259 | 0.304           | 0.302  | 0.492 |
| <b>PC utilization<br/>(&gt; 21 visits)</b>    | AIC             | 6.1                                       | 6.0   | 5.9   | 5.7             | 5.8    | 5.6   |
|                                               | pR <sup>2</sup> | 0.9                                       | 3.3   | 4.5   | 7.2             | 6.3    | 9.6   |
|                                               | AUC<br>ROC      | 0.567                                     | 0.637 | 0.655 | 0.696           | 0.685  | 0.731 |
|                                               | AUC_PR          | 0.201                                     | 0.250 | 0.271 | 0.303           | 0.290  | 0.339 |
| <b>Medications (&gt;13<br/>drugs)</b>         | AIC             | 8.6                                       | 8.0   | 7.8   | 7.4             | 7.4    | 7.3   |
|                                               | pR <sup>2</sup> | 0.8                                       | 7.2   | 10.5  | 14.3            | 14.1   | 16.2  |
|                                               | AUC<br>ROC      | 0.558                                     | 0.687 | 0.716 | 0.750           | 0.750  | 0.768 |



|                             |                 |       |       |       |       |       |       |
|-----------------------------|-----------------|-------|-------|-------|-------|-------|-------|
|                             | AUC_PR          | 0.380 | 0.517 | 0.564 | 0.606 | 0.605 | 0.634 |
| Expenditure<br>(>4,315.1 €) | AIC             | 7.5   | 7.0   | 6.9   | 6.6   | 6.6   | 5.2   |
|                             | pR <sup>2</sup> | 1.7   | 8.8   | 9.8   | 14.1  | 13.8  | 31.9  |
|                             | AUC<br>ROC      | 0.590 | 0.705 | 0.713 | 0.752 | 0.751 | 0.863 |
|                             | AUC_PR          | 0.315 | 0.447 | 0.458 | 0.513 | 0.511 | 0.708 |

**AUC\_PR**: area under the precision-recall. **AIC**: Akaike information criterion. **CCI**: Charlson Comorbidity Index. **ER**: emergency room. **GMA**: adjusted morbidity groups. **HCUP**: healthcare cost and utilization project of the US Agency for Healthcare Research and Quality. **PC**: primary care (>21 visits including general practitioner, nurse, and social worker, either at the primary care facility, home or via teleconsultation. **pR<sup>2</sup>**: pseudo-R squared.

Cells are colored according to the goodness of fit of each model for a given statistic, from red (worse) to strong green (best).
